# 1 A morphometric double dissociation: cortical thickness is more related to 2 aging; surface area is more related to cognition

3  
4 G. Sophia Borgeest <sup>1\*</sup>, Richard N. Henson <sup>1</sup>, Tim C. Kietzmann <sup>2</sup>, Christopher R. Madan <sup>4</sup>,  
5 Theresa Fox <sup>5</sup>, Maura Malpetti <sup>3</sup>, Delia Fuhrmann <sup>6</sup>, Ethan Knights <sup>1</sup>, Johan D. Carlin <sup>1</sup>,  
6 Cam- CAN, Rogier A. Kievit <sup>2</sup>

7 1: MRC Cognition and Brain Sciences Unit, University of Cambridge

8 2: Donders Institute for Brain, Cognition and Behaviour, Radboud University

9 3: School of Clinical Medicine, University of Cambridge

10 4: School of Psychology, University of Nottingham

11 5: Max Planck Institute of Human Development

12 6: Psychology Faculty, Kings College London

13 \*Corresponding author: [sophia.borgeest@mrc-cbu.cam.ac.uk](mailto:sophia.borgeest@mrc-cbu.cam.ac.uk)

## 14 Abstract

15 The *thickness* and *surface area* of cortex are genetically distinct aspects of brain structure, and  
16 may be affected differently by age. However, their potential to differentially predict age and  
17 cognitive abilities has been largely overlooked, likely because they are typically aggregated into  
18 the commonly used measure of *volume*. In a large sample of healthy adults (N=647, aged 18-88),  
19 we investigated the brain-age and brain-cognition relationships of thickness, surface area, and  
20 volume, plus five additional morphological shape metrics. Cortical thickness was the metric  
21 most strongly associated with age cross-sectionally, as well as exhibiting the steepest  
22 longitudinal change over time (subsample N=261, aged 25-84). In contrast, surface area was the  
23 best single predictor of age-residualized cognitive abilities (fluid intelligence), and changes in  
24 surface area were most strongly associated with cognitive change over time. These findings were  
25 replicated in an independent dataset (N=1345, aged 18-93). Our results suggest that cortical  
26 thickness and surface area make complementary contributions the age-brain-cognition triangle,  
27 and highlight the importance of considering these volumetric components separately.

## 28 Introduction

29 As the human brain ages, it undergoes a pronounced structural transformation. Even in the  
30 absence of neuropathology, overall brain volume shrinks – from age six onwards into old age  
31 (Bethlehem et al., 2021). This volume decline is associated with various physiological changes,  
32 including grey-matter reductions caused largely by the regression of dendrites (see Dickstein et  
33 al., 2007 for a review), and white-matter reductions stemming from axon demyelination  
34 (Fotinos et al., 2005; Gunning-Dixon et al., 2009; Raz, 2005; Scheltens et al., 1995). There are  
35 also morphological changes, with sulci for example becoming shallower (Burgmans et al., 2011;  
36 Jin et al., 2018; Madan, 2021; Peters, 2007) and cortex becoming more curved (Deppe et al., 2014).  
37 Traditionally, studies investigating human brain structure with Magnetic Resonance Imaging  
38 (MRI) have relied largely on volumetric or thickness measures (see Oschwald et al., 2020 for a  
39 review), which only capture a small proportion of the richness of age-related morphometric  
40 changes (Ecker et al., 2010; Im et al., 2008). Indeed, the number of papers that include both the  
41 term “aging” and “brain volume” (N=2715 in a PubMed search as of 01/06/2021) or “cortical  
42 thickness” (N=597) far exceeds those investigating other aspects of morphology, such as “aging”  
43 combined with “surface area” (N=125) or “curvature” (N=23). Even though several authors have  
44 pointed out that volume is a product of cortical thickness and surface area (Norbom et al., 2021;  
45 Storsve et al., 2014; Walhovd et al., 2016; Winkler et al., 2018), which in turn are two genetically  
46 independent aspects of brain structure (Hofer et al., 2020; McKay et al., 2014; Panizzon et al.,  
47 2009; van der Meer et al., 2020), the implication that thickness and area may have dissociable  
48 causes (e.g., in ageing) and consequences (e.g., for cognition) have rarely been discussed,  
49 especially in adult samples. Moreover, additional detailed morphometric shape measures (such  
50 as curvature or sulcal depth) may provide further insight into brain development across the  
51 adult lifespan and its relationship with cognitive performance.

52 In this paper, we explore multiple morphometric measures in two large adult-lifespan cohorts.  
53 We show, firstly, that the most pronounced structural changes in the aging brain are the  
54 decrease in apparent cortical thickness (see Walhovd et al., 2017 for the interpretation of MR-  
55 derived cortical thickness) and increase in cortical curvature, in line with other studies (Deppe  
56 et al., 2014; Hogstrom et al., 2013; Lemaitre et al., 2012). Secondly, we find that incorporating  
57 multiple shape measures into a single model outperforms any individual metrics’ ability to  
58 capture age-related and fluid cognitive differences. This paper’s main contribution, however,  
59 lies in providing cross-sectional and longitudinal evidence of a double dissociation in two  
60 independent, large-sample cohorts. Specifically, cortical thickness was more strongly associated

61 with age than cortical surface area, while surface area was more strongly associated with  
 62 cognition (as indexed by fluid intelligence). This pattern was most apparent longitudinally, but  
 63 we also observed it cross-sectionally after adjusting for age. This double dissociation points to  
 64 possibly distinct underlying biological processes (discussed below), and supports recent calls to  
 65 investigate thickness and surface area separately (Winkler et al., 2018) as brain volume (a  
 66 product of cortical thickness and surface area) likely conflates and therefore masks these  
 67 differentiable effects.

## 68 Results

### 69 Cross-sectional results

70 We first calculated whole brain as well as regional correlations between each metric and age,  
 71 cognitive abilities (as indexed by fluid intelligence) and age-residualized cognitive abilities  
 72 Residualized cognitive scores allow one to separate concurrent age-related decline in cognitive  
 73 ability, thus providing an age-independent measure of cognition. Thickinthehead, which is a  
 74 measure of cortical thickness from the Mindboggle software, showed the strongest whole-brain-  
 75 age correlations ( $r = -.83$ ). This was followed by curvature ( $r = +.77$ ), fractal dimensionality (a  
 76 measure of cortical complexity;  $r = -.65$ ) and FreeSurfer's standard cortical thickness ( $r = -.60$ ), as  
 77 shown in Table 1 and plotted in Figure 1. Compared to the other metrics, surface area exhibited  
 78 the weakest age relationship ( $r = -.36$ ). This order was reversed for age-residualized cognition.  
 79 Here, surface area was the strongest predictor ( $r = +0.21$ ), while the two thickness metrics and  
 80 curvature did not show significant brain-cognition correlations after adjusting for age. The two  
 81 volume measures (FreeSurfer's cortical volume, plus SPM's cortical + subcortical volume)  
 82 predicted both age and age-residualized fluid-intelligence reasonably well ( $r \sim -.55$  and  $0.20$ ,  
 83 respectively), as would be expected since they are proportional to the product of cortical  
 84 thickness and surface area. Fractal dimensionality was also a good predictor of both age and  
 85 age-residualized cognition ( $r_{\text{age}} = -0.65$ ,  $r_{\text{cog}} = 0.19$ ).

| Metric                  | Age       |          | Fluid Intelligence |          | Age-residualized Fluid Intelligence |          |
|-------------------------|-----------|----------|--------------------|----------|-------------------------------------|----------|
|                         | Pearson's | <i>P</i> | Pearson's          | <i>p</i> | Pearson's                           | <i>P</i> |
|                         | <i>r</i>  |          | <i>r</i>           |          | <i>r</i>                            |          |
| Cortical Volume (FS)    | -.62      | <.001    | +.56               | <.001    | +.20                                | <.001    |
| Cortical Thickness (FS) | -.60      | <.001    | +.42               | <.001    | +.04                                | .33      |
| Surface Area (FS)       | -.36      | <.001    | +.39               | <.001    | +.21                                | <.001    |
| Thickinthehead (MB)     | -.83      | <.001    | +.59               | <.001    | +.04                                | .34      |
| Curvature (MB)          | +.77      | <.001    | -.56               | <.001    | -.034                               | .39      |

|                        |      |       |      |       |      |       |
|------------------------|------|-------|------|-------|------|-------|
| Sulcal Depth (MB)      | -.38 | <.001 | +.51 | <.001 | +.07 | .06   |
| GM Volume (SPM)        | -.54 | <.001 | +.51 | <.001 | +.20 | <.001 |
| Fractal Dimensionality | -.65 | <.001 | +.56 | <.001 | +.19 | <.001 |

86 Table 1: whole brain correlations. GM = grey-matter. FS = FreeSurfer. SPM = Statistical Parametric  
87 Mapping. MB = Mindboggle.

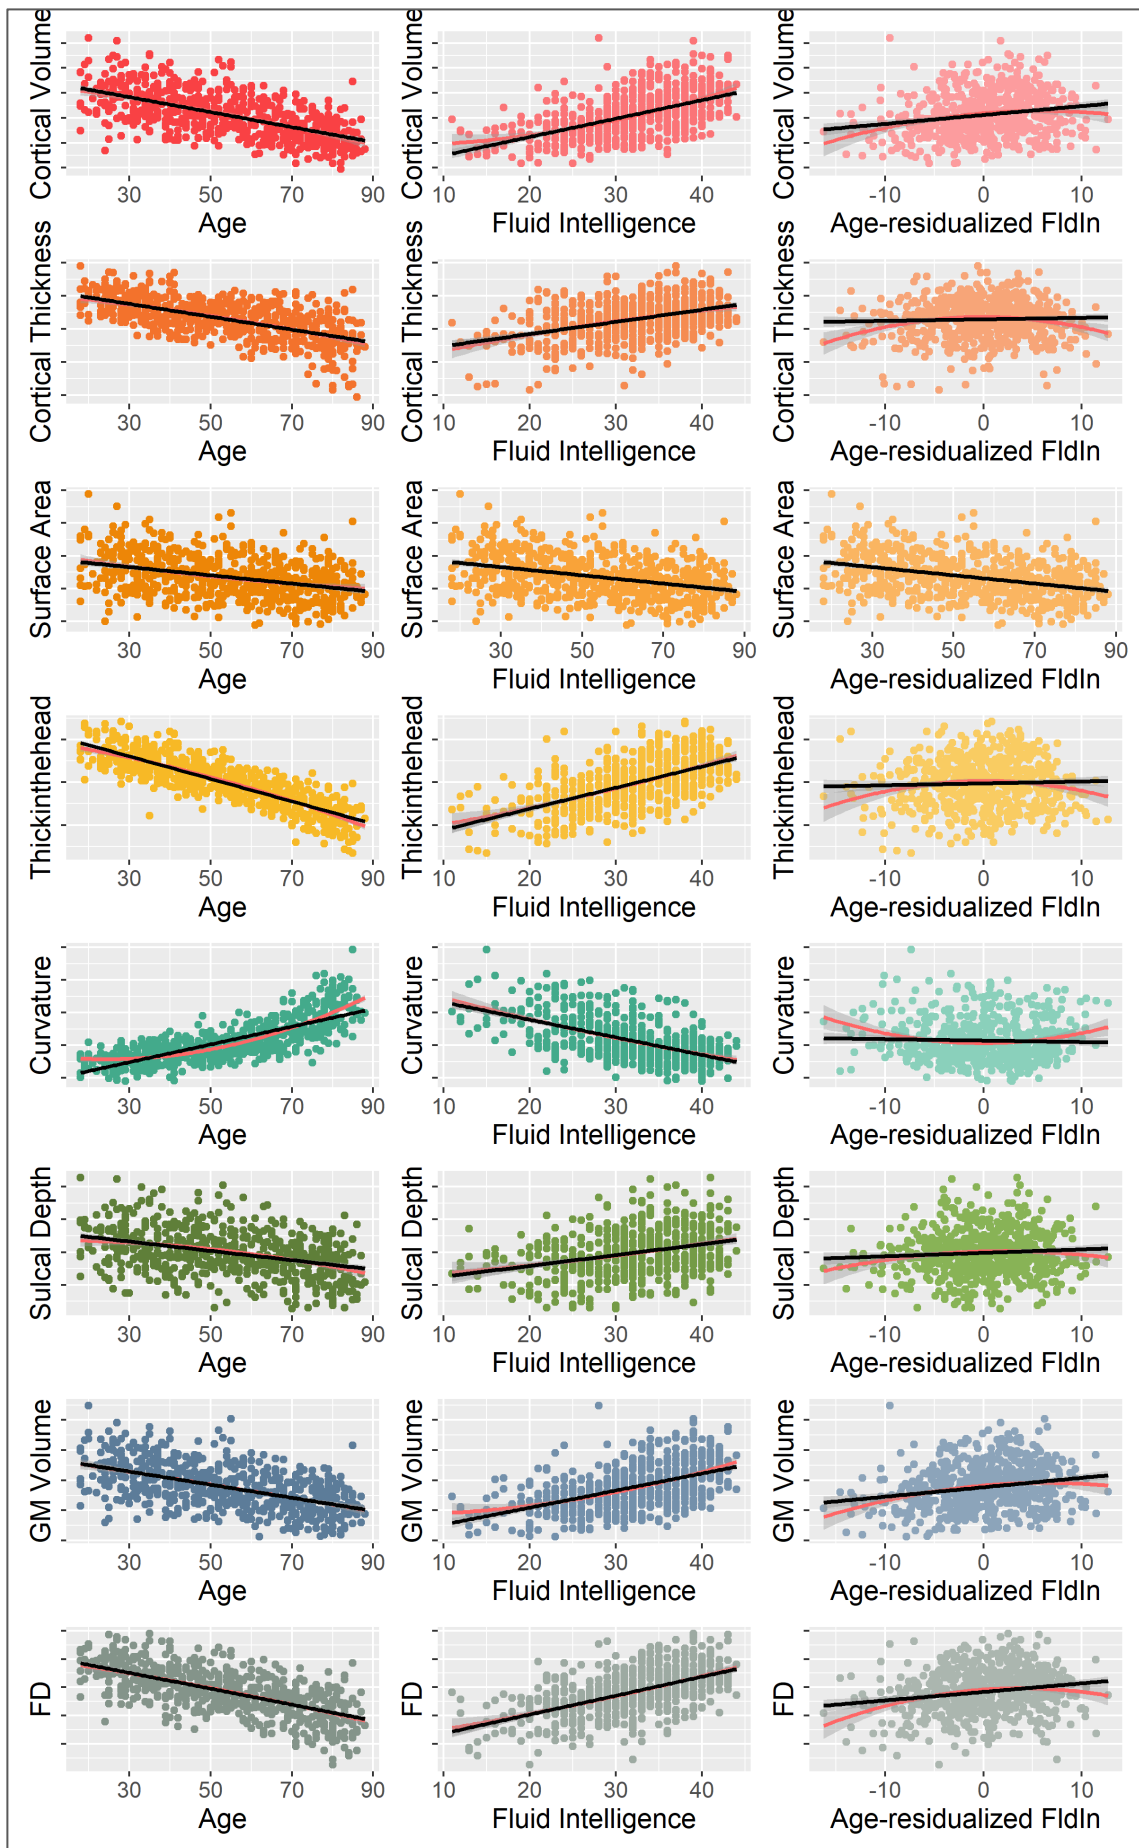

89 Figure 1: whole brain -age, -fluid intelligence and -age-residualized fluid intelligence scatterplots of all  
90 eight metrics. Black lines show linear fit, red lines show quadratic fit. The metric exhibiting the  
91 strongest age relationship is Thickinthehead (a measure of cortical thickness), while surface area is  
92 most strongly related to age-residualized cognitive abilities. GM = Grey Matter, FD = Fractal  
93 Dimensionality.

94

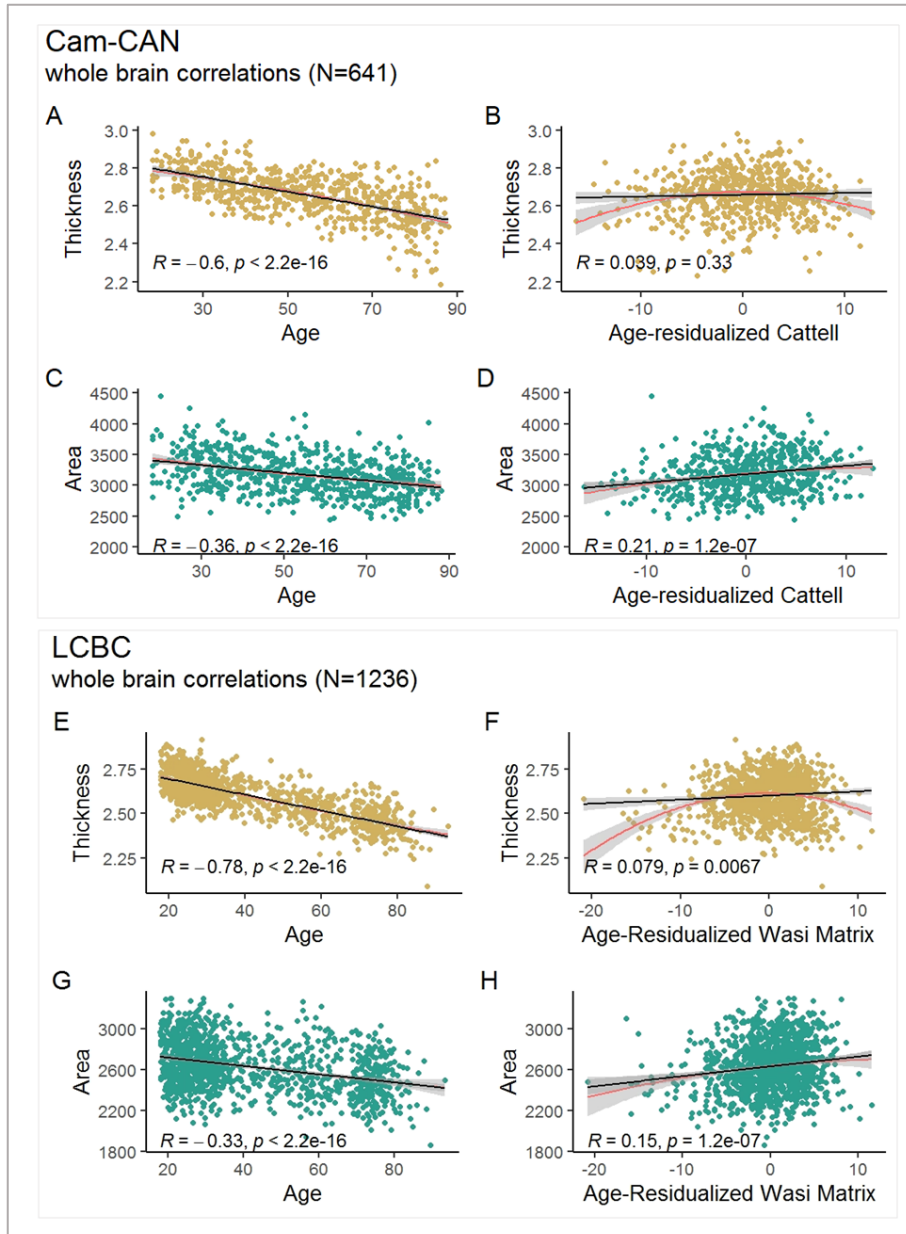

95

96 Figure 2: Cross-sectional whole brain correlations in Cam-CAN (A-D) and LCBC (E-H). While thickness  
97 is associated with age (not age-residualized cognition), surface area captures age-residualized cognition  
98 well (and age comparatively poorly).

99

100

101 Next, we estimated a series of path models to assess the relationship between brain structure  
102 and age, fluid intelligence and age-residualized fluid intelligence when both surface area and  
103 cortical thickness are included in the same model. Path analysis is an extension of multiple  
104 linear regressions, allowing researchers to assess the relationships between the predictor  
105 variables rather than having several independent variables predict one dependent variable  
106 (Streiner, 2005). Age and fluid intelligence were best captured by surface area and cortical  
107 thickness, while age-residualized fluid intelligence was associated only with surface area (see  
108 Figure 3). We validated this frequentist modelling approach with Bayesian model selection  
109 (supplementary Figures 4-5). Overall, the whole-brain, cross-sectional analyses suggest that  
110 cortical thickness and surface area differentially associated with age and age-residualized  
111 cognitive abilities, respectively.

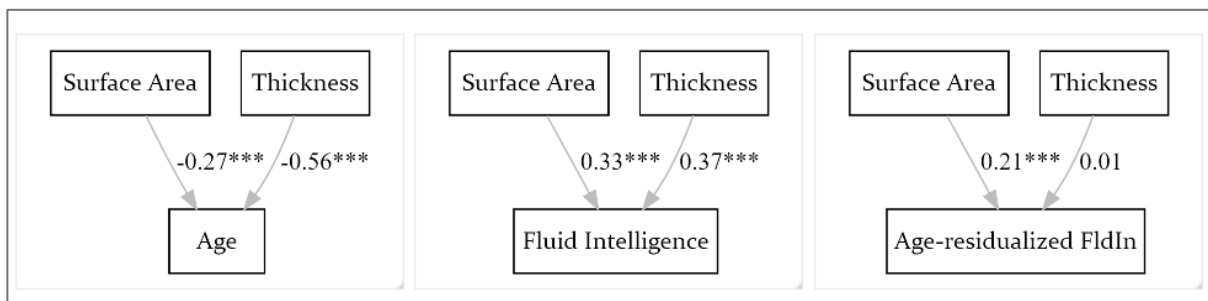

112

113 Figure 3: Cam-CAN path model results. Both surface area and thickness are significantly associated with  
114 age and fluid intelligence, while age-residualized fluid intelligence is captured by surface area only.

115 Our regional investigations further support the morphological dichotomy found in the whole  
116 brain analyses. As shown in Figure 4, for cortical thickness, all 32 brain regions (the 64 DKT  
117 regions averaged across the hemispheres) were significantly correlated with age (all correlations  
118 were FDR corrected at  $\alpha = 0.05$ ), while no region predicted age-residualized fluid  
119 intelligence ( $r < 0.07$ ,  $p_{\text{FDR}} > 0.05$ ; see supplementary tables 5-7). In contrast, for surface area, *all*  
120 regions were significantly associated with age-residualized cognitive abilities ( $r > 0.11$ ,  $p_{\text{FDR}} <$   
121  $0.05$ ). While regional surface area also correlated with age, the correlations were substantially  
122 weaker than the brain-age correlations for cortical thickness.

123 Finally, in addition to the “area and thickness only” path models, we ran three “full models”  
124 which each included all eight brain structure metrics to assess the metrics’ combined  
125 associations with age and cognition. The total variance explained by these models was 76, 46  
126 and 7 percent for age, fluid intelligence and age-residualized fluid intelligence, respectively –  
127 almost double the variance explained by thickness and area alone (see supplementary Figure 3).  
128 Moreover, the fact that multiple morphometric measures provided partially complementary



129 information about the outcome highlights the potential usefulness in assessing various  
130 morphological shape measures when investigating the ageing brain and cognitive abilities. This  
131 was further supported by regional brain-age and brain-cognition correlations (supplementary  
132 Figure 8): for instance, while volume-age effects were most pronounced in the frontal regions,  
133 depth-age effects were strongest in the temporal lobes. It is plausible that the focus on frontal  
134 brain regions in the brain and cognitive aging literature (Greenwood, 2000; Jung & Haier, 2007)  
135 is informed in part by the field's traditional focus on brain volume, and that other aspects of  
136 brain structure could point to more underappreciated regional effects.

137

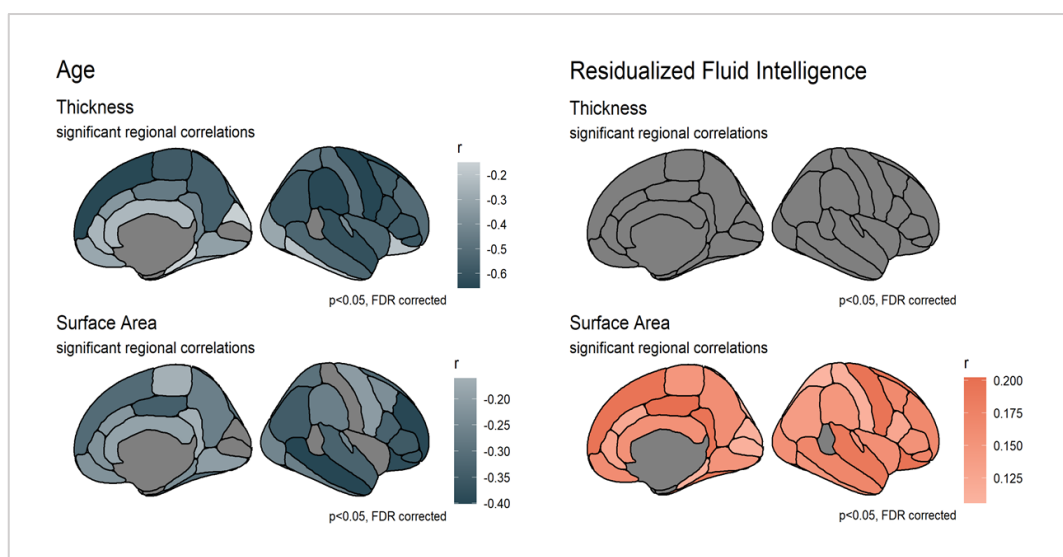

138

139 Figure 4: Significant regional age- and age-residualized fluid intelligence correlations. Correlations are  
140 FDR corrected at  $\alpha = 0.05$ . For cortical thickness, all 32 brain regions are significantly associated  
141 with age, while none are associated with age-residualized cognitive abilities. For surface area, all regions  
142 are correlated with age-residualized cognition. While regional surface area also correlated with age, the  
143 correlations were substantially weaker than the brain-age correlations for cortical thickness.

144

### 145 Longitudinal results

146 Although cross-sectional analyses offer an interesting insight into age-related cognitive and  
147 morphometric *differences*, longitudinal data are needed to truly assess how brain and cognitive  
148 *change* (Oswald et al., 2020). Doing so, we found that the change-change relationship  
149 between surface area and cognition was significantly stronger than the change-change  
150 relationship between volume and cognition as well as that between thickness and cognition.

151 After establishing metric and scalar invariance (described in supplementary section 7), we used  
152 Latent Change Score Models (LCSM) to examine morphometric and cognitive change over time.



153 The cognitive LCSM revealed significant change in cognition over time, as well as significant  
 154 variability in the rate of change (Table 2, variances). The effect size of change of fluid intelligence  
 155 was -0.04 (Cohen's D, computed by dividing the mean change by the SD at time 1). The three  
 156 brain-structure LCSMs also showed evidence of change over time (Table 2, intercepts) and of  
 157 significant variability in the rate of change (Table 2, variances). Surface area, volume and  
 158 thickness all decreased between the first and the second scan. Surface area had the smallest  
 159 effect size (Cohen's D = -0.02), with cortical thickness and volume exhibiting larger effects  
 160 (Cohen's D of -0.12 and -0.11, respectively).

161

**Latent change score model results Cam-CAN**

|                     |            | Estimate | SE       | z-value | p      | Std.all | Effect size |
|---------------------|------------|----------|----------|---------|--------|---------|-------------|
| <b>Cattell</b>      | Intercepts | -0.633   | 0.289    | -2.192  | 0.028  | -0.145  | -0.09       |
|                     | Variances  | 19.059   | 2.808    | 6.787   | <.0001 | 1.000   |             |
| <b>Thickness</b>    | Intercepts | -0.012   | 0.002    | -6.234  | <.0001 | -0.386  | -0.12       |
|                     | Variances  | 0.001    | 0.000    | 7.229   | <.0001 | 1.000   |             |
| <b>Surface Area</b> | Intercepts | -5.680   | 1.632    | -3.481  | <.0001 | -0.215  | -0.02       |
|                     | Variances  | 695.026  | 197.495  | 3.519   | <.0001 | 1.000   |             |
| <b>Volume</b>       | Intercepts | -50.550  | 5.887    | -8.587  | <.0001 | -0.530  | -0.11       |
|                     | Variances  | 9080.25  | 1057.968 | 8.587   | <.0001 | 1.000   |             |

162 Table 2: latent change score model results for change in Cattell, surface area, thickness and volume over  
 163 time. Effect size is calculated by dividing the mean change by the square root of the variance.

164

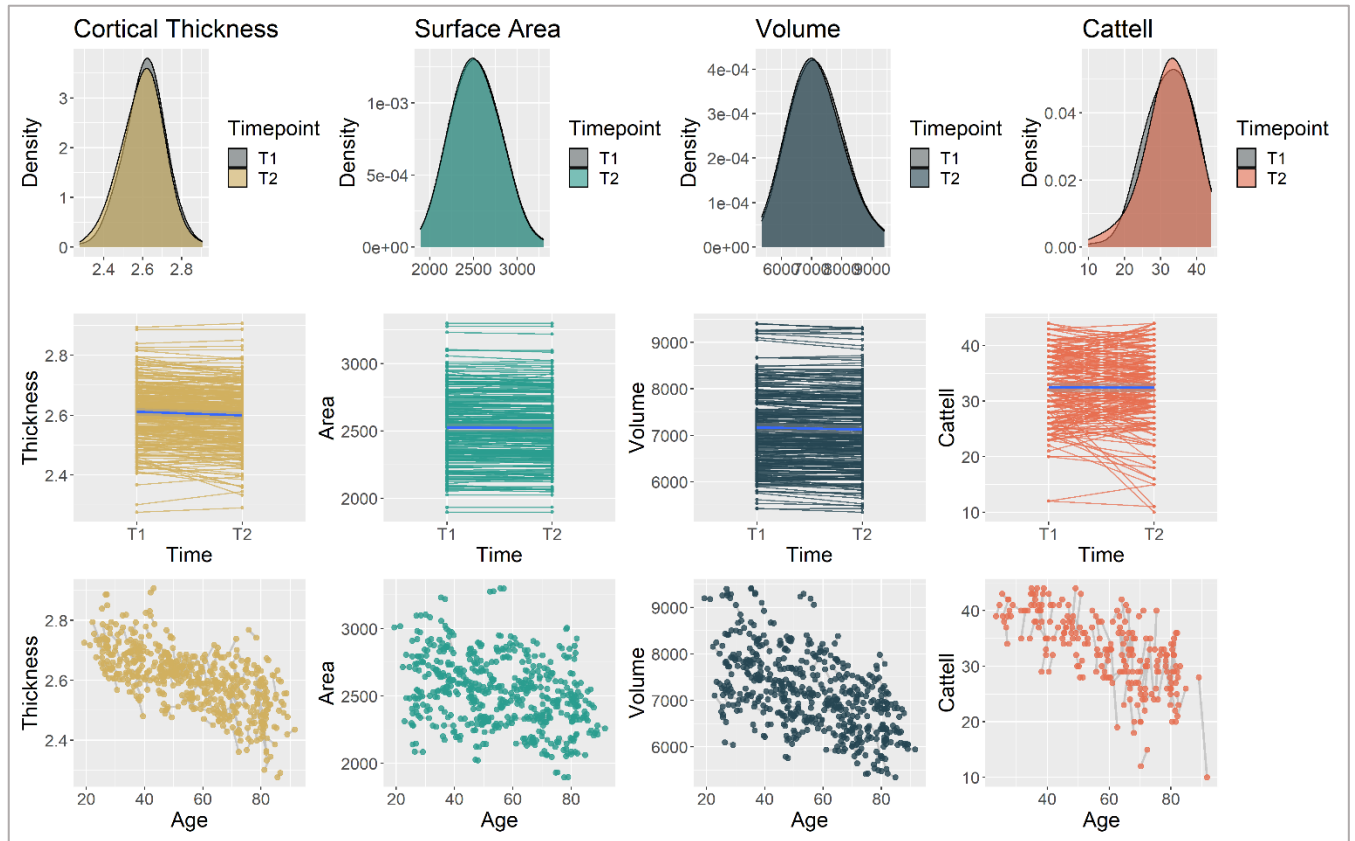

165

166 Figure 5: In Cam-CAN, cortical thickness, surface area and fluid intelligence declined significantly  
 167 between time point 1 and time point 2 (average interval between the two time points = 1.33 years).

168 Next, to investigate the relationship between cognitive change and morphometric change, we  
 169 fit three second order latent change score models ( $\Delta$ LCSM), one for each brain structure metric.  
 170 We used full information maximum likelihood (FIML, Enders & Mansolf, 2018) with robust  
 171 standard errors to account for missing data. Results are shown in Table 3.

172

| Data    | Model                 | CFI   | r      | p      |
|---------|-----------------------|-------|--------|--------|
| Cam-CAN | Area – Cognition      | 0.972 | 0.23   | <0.001 |
|         | Thickness – Cognition | 0.978 | -0.022 | 0.71   |
|         | Volume – Cognition    | 0.975 | 0.11   | 0.068  |
| LCBC    | Area – Cognition      | 0.987 | 0.35   | <0.001 |
|         | Thickness – Cognition | 0.994 | 0.21   | <0.001 |
|         | Volume – Cognition    | 0.921 | 0.15   | <0.001 |

173 Table 3: Second order latent change score model results using FIML for missing data. Shows the  
 174 relationship between change in brain structure (volume, thickness, area) and change in cognition in  
 175 Cam-CAN and LCBC. In both datasets, change in surface area was most strongly associated with  
 176 cognitive change.

177 All three models fit the data well: CFI<sub>area</sub> = 0.972; CFI<sub>volume</sub> = 0.975; CFI<sub>thickness</sub> = 0.978; (further  
 178 model fit indices can be found in section 7 of the supplementary materials). After fitting the  
 179 models, we extracted and correlated the cognitive rates of change with the brain structural rates  
 180 of change. Change in surface area showed the largest effect ( $r = 0.23$ ,  $p < .001$ ), followed by (non-  
 181 significantly) volume ( $r = -0.11$ ,  $p = 0.068$ ) and cortical thickness ( $r = -0.022$ ,  $p = 0.71$ ). The Steiger's-  
 182 Z tests (Steiger, 1980) in the R package psych can directly compare differences in correlation  
 183 strengths, accounting for the full correlation pattern among variables. Doing so revealed that  
 184 change in area was significantly more strongly associated with change in cognition than was  
 185 thickness or volume change (see Table 4).

| Data    | Comparison         | r values    | N   | Z    | p     |
|---------|--------------------|-------------|-----|------|-------|
| Cam-CAN | Thickness / Area   | -0.022/0.23 | 362 | 3.34 | 0.001 |
|         | Thickness / Volume | -0.022/0.11 | 362 | 1.66 | 0.1   |
|         | Volume / Area      | 0.11/0.23   | 362 | 1.77 | 0.04  |
| LCBC    | Thickness / Area   | 0.21/0.35   | 722 | 2.89 | 0.001 |
|         | Thickness / Volume | 0.21/0.15   | 722 | 1.18 | 0.24  |
|         | Volume / Area      | 0.15/0.35   | 722 | 4.06 | 0.001 |

186 Table 4: Steiger's Z Test results. *P*-value (two-tailed) of  $< 0.05$  suggests correlation coefficients are  
 187 significantly different from each other.

188 These results suggest that people whose surface area decreased more quickly also showed  
 189 steeper rates of cognitive decline; an effect not found for thickness or volume.

190 Note that the models shown above include observed (not latent) variables to ensure maximum  
 191 comparability between the LCBC and Cam-CAN models (in LCBC, it was not possible to derive  
 192 latent cognitive scores because only WASI sum scores were available). However, latent variable  
 193 Cam-CAN models (which we had run initially, before the replication study) show the same  
 194 pattern, with changes in surface area most strongly associated with changes in cognition  
 195 ( $r = 0.44$ ,  $p < 0.001$ ). For these models, changes in volume were significantly associated with  
 196 changes in fluid intelligence ( $r = 0.26$ ,  $p = < 0.001$ ), while this relationship remained insignificant  
 197 for cortical thickness ( $r = 0.0047$ ,  $p = 0.94$ ). All longitudinal change score model results are  
 198 plotted in supplementary Figure 13.

### 199 Replication results

200 To examine whether our cross-sectional and longitudinal findings generalize to other cohorts,  
 201 we next (after finalizing the analyses in Cam-CAN) examined the same associations in an  
 202 independent sample, the LCBC data. Because of their widespread use and accessibility, we

203 included the three FreeSurfer-derived metrics (thickness, area, volume) in our replication  
204 analyses.

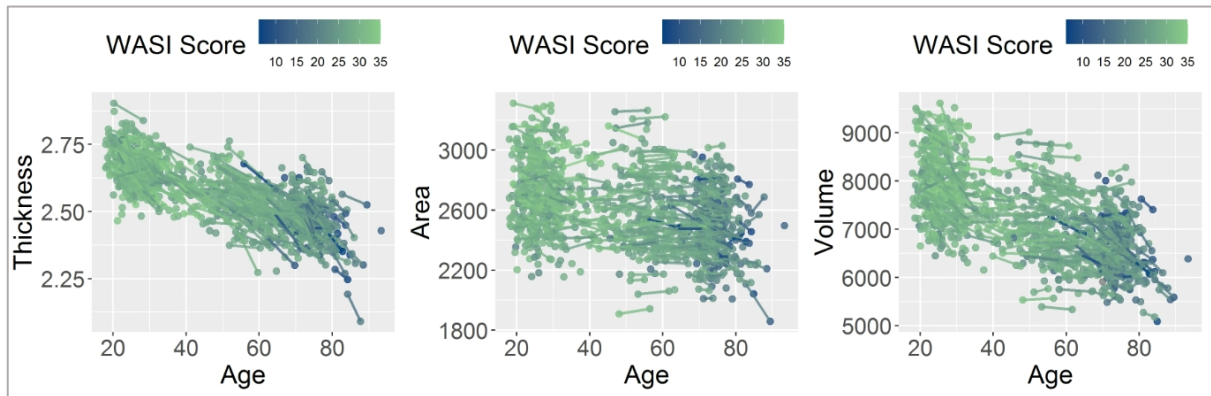

205

206 Figure 6: The relationship between age, brain structure and cognition in LCBC.

207 Cross-sectionally, as shown in Figure 2 (E-H), thickness showed the strongest whole brain-age  
208 correlation ( $R = -.78$ ,  $p < 0.001$ ), followed by volume ( $R = -0.64$ ,  $p < 0.001$ ) then surface area ( $R =$   
209  $-0.34$ ,  $p < 0.001$ ). For age-residualized fluid intelligence, thickness had the weakest correlation  
210 ( $R = 0.077$ ,  $p = 0.009$ ), followed by surface area ( $R = 0.13$ ,  $p = 0.001$ ) and volume ( $0.15$ ,  $p < 0.001$ ;  
211 and supplemental Table 3). As was the case in Cam-CAN, the frequentist path models and  
212 Bayesian model selection revealed that the best models to predict age and fluid intelligence  
213 were comprised of both surface area and thickness, while age-residualized fluid intelligence was  
214 best captured by surface area alone (Figure 7).

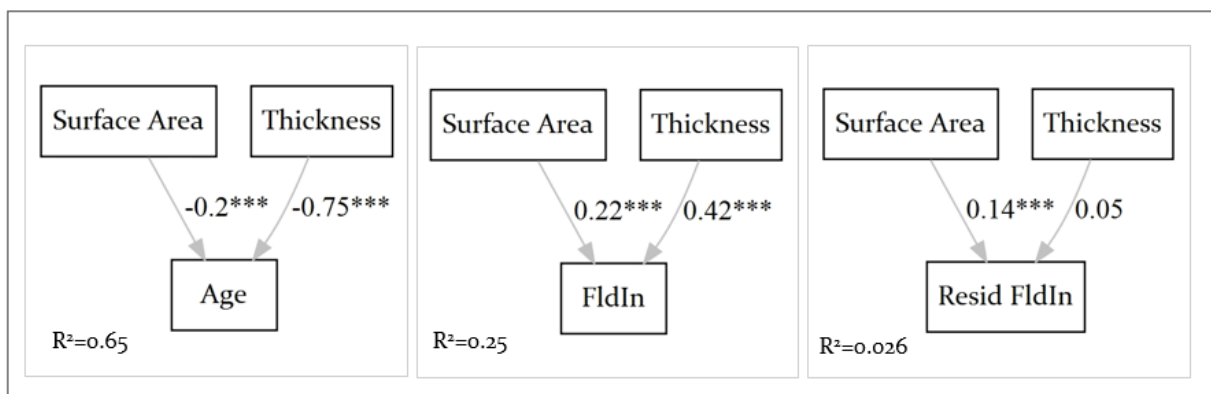

215

216 Figure 7: LCBC path model results. Both surface area and thickness are significantly associated with age  
217 and fluid intelligence, while age-residualized fluid intelligence is captured by surface area only.

218 Longitudinally, we found evidence of significant change over time for the three brain metrics  
219 (Table 5, intercepts), and significant variability over time for the brain metrics and cognition  
220 (Table 5, variances). A lack of mean cognitive decline can most likely be attributed to test-retest  
221 effects, but still allows for investigation of individual differences in change.

### Latent change score model results LCBC

|                     |            | Estimate  | SE       | z-value | <i>p</i> | Std.all | Effect size |
|---------------------|------------|-----------|----------|---------|----------|---------|-------------|
| <b>WASI</b>         | Intercepts | -0.247    | 0.166    | -1.488  | 0.137    | -0.078  | -0.051      |
|                     | Variances  | 10.069    | 1.246    | 8.080   | <.0001   | 1.000   |             |
| <b>Thickness</b>    | Intercepts | -0.039    | 0.002    | -19.815 | <.0001   | -1.039  | -0.340      |
|                     | Variances  | 0.001     | 0.000    | 12.191  | <.0001   | 1.000   |             |
| <b>Surface Area</b> | Intercepts | -14.853   | 1.935    | -7.678  | <.0001   | -0.412  | -0.059      |
|                     | Variances  | 1301.028  | 187.252  | 20.513  | <.0001   | 1.000   |             |
| <b>Volume</b>       | Intercepts | -130.745  | 8.885    | -14.716 | <.0001   | -0.806  | -0.15       |
|                     | Variances  | 26327.152 | 2368.341 | 11.116  | <.0001   | 1.000   |             |

222 Table 5: LCBC data latent change score model results for change in WASI Matrix, surface area, thickness  
 223 and volume over time. Effect size is calculated by dividing the mean change by the square root of the  
 224 variance.

225

226 As shown in Table 3, the three  $\Delta$ LCMs fit the data well: CFI area = 0.987; CFI volume = 0.921;  
 227 CFI thickness = 0.994 (further model fit indices can be found in the supplementary materials).  
 228 Change in all structural brain metrics was significantly associated with change in cognition with  
 229 surface area showing the largest effect ( $r = 0.35, p < .001$ ), followed by thickness ( $r = 0.22, p < .001$ )  
 230 then volume ( $r = 0.15, p = 0.001$ ). The Steiger's Z-Test revealed that the change-change  
 231 relationship between area and cognition was significantly stronger than that between volume  
 232 and cognition and thickness and cognition (see Table 4).

233 The LCBC longitudinal results replicated those found in Cam-CAN, further supporting the  
 234 finding that changes in surface area predict changes in cognition and that this relationship is  
 235 stronger than that between change in thickness and change in cognition. We therefore  
 236 successfully replicated Cam-CAN's cross-sectional and longitudinal findings.

237

238

239

240

## 241 Discussion

### 242 A morphometric double dissociation

243 Across two independent cohorts, we found evidence of a morphometric double dissociation:  
244 cortical thickness was more strongly associated with age than cortical surface area, both cross-  
245 sectionally and longitudinally, whereas surface area was more strongly associated with  
246 cognition (fluid intelligence); certainly longitudinally, and also cross-sectionally, after removing  
247 age-related variance. Note that we are not claiming that cortical thickness plays *no* role in  
248 cognition – it shows a longitudinal association with cognitive change in one of the two datasets  
249 (albeit significantly smaller than that of surface area), and its cross-sectional association with  
250 fluid intelligence was significant. The lack of cross-sectional association with age-residualized  
251 fluid intelligence could be due to collider bias whereby cortical thickness is causally related to  
252 both age and cognition and that any thickness-cognition effect disappears when removing age.  
253 Our results do suggest, however, that surface area and thickness, which tend to be investigated  
254 together through the aggregate measure of volume, may have dissociable causes (e.g., in ageing)  
255 and consequences (e.g., for cognition).

256 Our findings align with previous studies that have pointed to a relationship between surface  
257 area and cognition (Cox et al., 2018; Fjell et al., 2015; Gerrits et al., 2016) and support recent calls  
258 to focus on the distinctness of cortical thickness and surface area, rather than assessing them  
259 jointly through cortical volume (Winkler et al., 2018). Such a shift is not just of theoretical or  
260 methodological importance: because surface area and cortical thickness are known to be  
261 genetically distinct (Panizzon et al., 2009; Winkler et al., 2010) and to follow different  
262 trajectories over the lifespan (Fjell et al., 2015; Hogstrom et al., 2013), combining them into  
263 volume is likely to obscure important biological differences and mechanisms.

264 While we can, in the present study, only speculate on the biological basis of different  
265 morphological metrics (and therefore their age/cognition dichotomy), evidence from animal  
266 and histological studies point to a possibly relevant set of mechanisms. With age, the long  
267 dendrites of pyramidal neurons have been shown to decrease rapidly across all layers of the  
268 cortex (Jacobs et al., 2001; Nakamura et al., 1985; Panizzon et al., 2009) and especially in layer V  
269 – the internal pyramidal layer – which contains the majority of large pyramidal neurons and is  
270 therefore the thickest of the six cortical layers – at least after the age of 50 (de Brabander et al.,  
271 1998). Thus, the steep declines in cortical thickness observed in the present study (and  
272 elsewhere, e.g. Lemaitre et al., 2012; Chen et al., 2011) are likely in part due to dendritic shrinkage.

273 Furthermore, our finding that cortical thickness is less strongly associated with cognitive  
274 abilities than other measures of brain structure is also supported by animal research, showing  
275 that rates of dendritic atrophy in rats did not differ between aged cognitive unpaired and aged  
276 cognitive impaired animals (Allard et al., 2012)

277 What, if not dendritic atrophy, is driving cognitive differences and cognitive change, and why  
278 might cognition be related to surface area? According to the radial unit hypothesis (Rakic, 2000)  
279 while the development of cortical thickness is driven by the layers in the cortical columns (as  
280 described above), the development of surface area is a product of the number of radial columns  
281 perpendicular to the pial surface. This theory has been updated via the Supragranular Cortex  
282 Expansion Hypothesis (Nowakowski et al., 2016), which postulates that specific cellular  
283 mechanisms allow certain types of glial cells to migrate towards the pial surface during  
284 development, thereby expanding the cortex, and that this process is, in turn, responsible for  
285 many of the cognitive features unique to primates. This is further supported by analyses  
286 suggesting that glial cells – and specifically glial-neural signalling – affect cognition (Chung et  
287 al., 2015). A plausible hypothesis therefore is that MR-derived surface area (at least partially)  
288 picks up on these glial-dependent neural mechanisms – which likely originate in early  
289 development – and thereby on cognitive difference and changes.

#### 290 The shape of the ageing brain

291 A second contribution this paper makes is to characterize structural age-related differences and  
292 changes across multiple morphological metrics. While there have been multiple robust studies  
293 comparing different imaging metrics (Hutton et al., 2009; Im et al., 2008; Lövdén et al., 2013;  
294 Pantazis et al., 2010; Shimony et al., 2016; Wang et al., 2019; Wierenga et al., 2014), few have  
295 included the breadth of morphometry assessed here. Our approach, therefore, allowed us to  
296 directly compare the magnitude of cortical age-related differences and changes across a range  
297 of metrics.

298 The biggest age-related change (cross-sectionally and longitudinally) was that of cortical  
299 thickness, followed (cross-sectionally) by curvature. This suggests that the most striking  
300 structural transformation the human brain undergoes with age – at least of those detectable  
301 with MRI – is that the cortex thins while also becoming more ‘curved’. The width and depth of  
302 cortical sulci might influence the complexity metric, such that more atrophied brains might  
303 exhibit an increase in gyral complexity but not a decrease in surface area (Narr, et al., 2004;  
304 Lemaitre et al., 2012).



305 We also show that *combining* shape measures outperforms any individual metrics' ability to  
306 capture age-related and cognitive differences: together, the eight morphometric metrics  
307 assessed here explained almost double the variance compared to that captured by thickness and  
308 surface area alone. Thus, the fact that multiple morphometric measures provided partially  
309 complementary information about the outcome highlights the potential usefulness in assessing  
310 various morphological shape measures when investigating the ageing brain and cognitive  
311 abilities.

### 312 Methodological strengths and limitations

313 In addition to the large sample size and the assessment of multiple shape metrics, the  
314 integration of cross-sectional and longitudinal data is of note. Recent reviews and commentaries  
315 have pointed to the limitations of cross-sectional analyses when investigating brain-cognition  
316 relationships in the ageing brain (see Oswald 2020 for a discussion). While we agree that  
317 collecting longitudinal data is almost always preferable, we acknowledge that it is not always  
318 attainable. Our approach of integrating cross-sectional and longitudinal data, where the latter  
319 largely confirmed the findings of the former, offers some validation of cross-sectional  
320 approaches.

321 Another key strength of this paper is that we successfully replicated our cross-sectional and  
322 longitudinal findings in an independent cohort. In doing so, we not only validated the apparent  
323 existence of the morphological double dissociation, but showed that it is not subject to specific  
324 features of the Cam-CAN data. Indeed, replicating our results despite important differences  
325 between the two datasets increases the robustness of our findings considerably. For instance,  
326 the cognitive tests differed (Cattell in Cam-CAN, WASI Matrix in LCBC), suggesting that surface  
327 area captures the broader construct of fluid intelligence (rather than test-specific features).  
328 Moreover, while the morphological metrics assessed in our initial Cam-CAN study offered an  
329 intriguing description of the ageing brain, obtaining them required five separate processing  
330 pipelines (FreeSurfer (Fischl, 2012), FreeSurfer Long (Reuter et al., 2012), Mindboggle (Klein et  
331 al., 2017), SPM (Ashburner & Friston, 2000) and the Fractal Dimensionality Toolbox calcFD  
332 (Madan & Kensinger, 2016)). The fact that our results replicated in canonical metrics (all of  
333 which are part of the standard FreeSurfer output) might lower the threshold for future research  
334 to, where appropriate, investigate surface area and cortical thickness separately.

335 The breadth of structural brain metrics reviewed in this paper also comes with some important  
336 limitations. First, we were not able investigate the *changes* of several of the metrics which we  
337 had assessed in our cross-sectional analyses. This is because the pipelines used to calculate these

338 additional metrics (e.g. Mindboggle) are not yet optimised for longitudinal data. Particularly  
339 curvature, which showed a very strong age effect cross-sectionally, would have been interesting  
340 to explore longitudinally. Likewise, fractal dimensionality, which measures cortical complexity  
341 and correlated strongly with age *and* cognition in our cross-sectional analyses, might be a  
342 promising candidate for future longitudinal investigations.

## 343 Conclusion

344 In this paper, we found cross-sectional and longitudinal evidence for a brain-cognition double  
345 dissociation: two morphological metrics, surface area and cortical thickness, which tend to be  
346 investigated together through grey matter volume, are differentially associated with age and  
347 fluid intelligence: while thickness is strongly associated with age, it has weak associations with  
348 change in fluid intelligence – a pattern that is reversed for surface area, which captures  
349 cognitive change and difference well, and age relatively poorly. We therefore recommend that  
350 rather than using grey matter volume as the default measure, researchers should choose  
351 structural brain metrics depending on the question under investigation. Doing so will allow us  
352 to advance our understanding of the functional significance of these dissociable aspects of  
353 brain morphology.

## 354 Methods

### 355 Initial Cohort

#### 356 Participants

357 Participants were drawn from the Cambridge Centre for Ageing and Neuroscience (Cam-CAN)  
358 study, which has been described in more detail elsewhere (Shafto et al., 2014; Taylor et al., 2017).  
359 708 healthy adults (359 women, 349 men) from the larger cohort were scanned, with  
360 approximately 100 people in each decade (age range 18-88, Mean=53.4, Standard Deviation (sd)  
361 = 18.62). We used calendar age (years) as a measure of participants' age. Cognitive ability was  
362 measured using the Cattell Culture Fair test of fluid intelligence (Cattell, 1971). For an age-  
363 independent measure of cognition, we calculated age-residualized fluid intelligence scores by  
364 regressing the Cattell raw scores on age (see Borgeest et al., 2019). Residuals adjust for age-  
365 expected declines, allowing, for example, an 80-year-old person with a relatively low absolute  
366 score to be considered cognitively healthier than a younger individual with a higher score.

367 A subset of participants (N=261) was scanned twice, with an average interval between the first  
368 and the second scan of 1.33 years (sd = 0.66). Additionally, a (partially separate) subset of  
369 participants (N=233) completed the Cattell test twice with an average interval between the two

370 cognitive tests of 6.0 years ( $sd = 0.67$ ). Two waves of both brain *and* cognitive data were available  
371 for 115 participants.

### 372 [Imaging data acquisition and pre-processing](#)

373 T1- and T2-weighted 1 mm isotropic magnetic resonance imaging scans were available for 647  
374 participants (Taylor et al., 2017). To ensure the quality of the image segmentations, we adapted  
375 a recently developed supervised learning tool (Klapwijk et al., 2019), which led us to exclude six  
376 participants due to low-quality segmentations. Our quality control process is described further  
377 the supplementary materials. In order to investigate (cross-sectional) brain morphology in as  
378 much detail as possible, we examined a total of eight brain metrics: in addition to three  
379 FreeSurfer-derived measures of cortical volume, thickness and surface area (derived from a  
380 standard FreeSurfer recon-all pipeline), we examined grey-matter volume derived from SPM 12  
381 (voxel-based morphometry which includes sub-cortical grey-matter too, while FreeSurfer  
382 includes only cortical estimates) and four additional morphological measures: from *Mindboggle*  
383 (see Klein et al. 2017 for more detail) we derived sulcal depth, curvature and “thickinthehead”  
384 (a recently developed cortical thickness measure that avoids FreeSurfer’s reconstruction-based  
385 limitations); and from the *calcFD* toolbox (Madan & Kensinger, 2016) we calculated fractal  
386 dimensionality as a measure of cortical complexity. To extract reliable brain structure estimates  
387 from the longitudinal subsample, images were automatically processed with FreeSurfer’s  
388 longitudinal stream (Reuter et al., 2012). This yielded co-registered measures of volume, cortical  
389 thickness and surface area for the two waves. Note that we did not explore the other  
390 morphological metrics longitudinally because the *Mindboggle* and *calcFD* pipeline are not  
391 currently optimised for longitudinal data (see discussion). Brain regions were defined according  
392 to the Desikan-Killiany-Tourville (DKT) protocol, which yields 62 brain regions (Klein &  
393 Tourville, 2012).

394

### 395 [Cross-sectional analyses](#)

396 All analyses were carried out using R (R Core Team, 2013), and the code used for this paper is  
397 available on the Open Science Framework (<https://osf.io/n6b4j/>).

398 First, we calculated whole brain as well as regional correlations between each metric and age,  
399 fluid intelligence and age-residualized fluid intelligence. Regional correlations were FDR  
400 corrected at  $\alpha = 0.05$ . Next, we estimated a series of path models to assess which  
401 combination of whole brain metrics best predicted age, fluid intelligence and age-residualized  
402 fluid intelligence. We then examined the robustness of our frequentist modelling approach with  
403 a Bayesian modelling framework (see supplementary materials).

#### 404 Longitudinal analyses

405 To assess neural and fluid intelligence change between time point 1 and time point 2, we fit a  
406 series of longitudinal structural equation models for each longitudinal FreeSurfer metric (whole  
407 brain volume, thickness and surface area) and fluid intelligence. Before assessing cognitive  
408 change, we also tested for longitudinal measurement invariance (Widaman et al., 2010).  
409 Additionally, as the second Cattell test was completed online by approximately half of the  
410 participants, versus pencil and paper by the other half, we investigated whether these two  
411 groups differed in their measurement properties by assessing metric invariance (constraining  
412 factor loadings) and scalar invariance (constraining intercepts).

413 To understand whether cognitive change was correlated with morphometric change, and if so,  
414 whether this relationship differed for the different cortical metrics, we extracted and estimated  
415 the rates of cognitive and brain structure change in a series of second order latent change score  
416 models (Ferrer et al., 2008; Ferrer & McArdle, 2010; McArdle & Hamagami, 2001; McArdle &  
417 Nesselrode, 2003). Second order latent change score models (2LCSM) first estimate latent  
418 factors at each time point, and then estimate latent change over time. Steiger's Z-Tests were  
419 performed to assess whether the change-change relationships differed significantly between the  
420 different metrics (Steiger, 1980). Given that properties of the data, obtaining latent cognitive  
421 scores was not possible in the replication sample (see below), so we also ran the models with  
422 observed variables only within Cam-CAN to ensure maximal comparability between the two  
423 sets of analyses. We ran models on participants with at least one cognitive score (N=362) using  
424 full information maximum likelihood (FIML, which assumes data are missing-at-random,  
425 Enders & Mansolf, 2018, and enables robust standard errors to account for missingness).

#### 426 Replication Cohort

427 To assess the robustness of our results, we investigated whether our core findings replicated in  
428 a second, independent dataset. To this end, we analysed data from the Centre for Lifespan  
429 Changes in Brain and Cognition at the University of Oslo (LCBC; <https://www.oslobrains.no/>),  
430 which is part of the European Lifebrain project (Walhovd et al., 2018) together with Cam-CAN  
431 and other publicly available datasets. The LCBC data consist of a collection of studies, which  
432 have been described elsewhere (Walhovd et al., 2016). Briefly, our analyses included 1236 adults  
433 aged 18-93 years (median = 37, sd = 20.64). We used WASI Matrix (raw scores) as our measure  
434 of fluid intelligence because it is most similar to the Cattell task assessed in Cam-CAN.  
435 FreeSurfer-derived cortical thickness, volume and surface area served as our morphological  
436 measures (for details on cross-sectional and longitudinal image acquisition and pre-processing  
437 see (Walhovd et al., 2016)). At least two waves of cognitive and/or neural data were available for

438 389 participants. Where participants had more than two waves, we selected their first and last  
439 time point, maximizing the interval between waves as well as the data similarity between  
440 samples. This allowed us to include the largest possible number of participants in our  
441 longitudinal analyses while maintaining two-wave models comparable to those described in  
442 Cam-CAN. The mean interval between the two waves so defined was 5.18 years (min = 0.73, max  
443 = 10.0, sd = 2.59 years).

444 Our analysis pipeline mirrored that described above: cross-sectionally, whole brain correlations  
445 were followed by frequentist path models and Bayesian model selection analyses.  
446 Longitudinally, LCSMs assessed cognitive and neural change separately; and we ran a series  
447 of 2LCSMs to investigate the relationship between cognitive change and neural change. The FIML  
448 models included 722 participants. Note that it was not possible to derive latent cognitive factor  
449 scores for the longitudinal models as individual WASI scores were not available, so the LCBC  
450 longitudinal models used observed cognitive variables (but were otherwise identical to Cam-  
451 CAN models). The LCSM data and analyses are described in more detail in the supplementary  
452 material.

453

## 454 References

455

456 Allard, S., Scardochio, T., Cuello, A. C., & Ribeiro-da-Silva, A. (2012). Correlation of cognitive  
457 performance and morphological changes in neocortical pyramidal neurons in aging.

458 *Neurobiology of Aging*, 33(7), 1466–1480.

459 <https://doi.org/10.1016/j.neurobiolaging.2010.10.011>

460 Ashburner, J., & Friston, K. J. (2000). Voxel-Based Morphometry—The Methods. *NeuroImage*, 11(6),

461 805–821. <https://doi.org/10.1006/nimg.2000.0582>

462 Bethlehem, R. a. I., Seidlitz, J., White, S. R., Vogel, J. W., Anderson, K. M., Adamson, C., Adler, S.,

463 Alexopoulos, G. S., Anagnostou, E., Areces-Gonzalez, A., Astle, D. E., Auyeung, B., Ayub, M.,

464 Ball, G., Baron-Cohen, S., Beare, R., Bedford, S. A., Benegal, V., Beyer, F., ... Alexander-Bloch,

465 A. F. (2021). Brain charts for the human lifespan. *BioRxiv*, 2021.06.08.447489.

466 <https://doi.org/10.1101/2021.06.08.447489>

467 Burgmans, S., Gronenschild, E. H. B. M., Fandakova, Y., Shing, Y. L., van Boxtel, M. P. J., Vuurman, E.

468 F. P. M., Uylings, H. B. M., Jolles, J., & Raz, N. (2011). Age differences in speed of processing

469 are partially mediated by differences in axonal integrity. *NeuroImage*, 55(3), 1287–1297.

470 <https://doi.org/10.1016/j.neuroimage.2011.01.002>

471 Cattell, R. B. (1971). *Abilities: Their structure, growth, and action* (pp. xxii, 583). Houghton Mifflin.

472 Chung, W.-S., Welsh, C. A., Barres, B. A., & Stevens, B. (2015). Do glia drive synaptic and cognitive

473 impairment in disease? *Nature Neuroscience*, 18(11), 1539–1545.

474 <https://doi.org/10.1038/nn.4142>

475 Cox, S. R., Bastin, M. E., Ritchie, S. J., Dickie, D. A., Liewald, D. C., Muñoz Maniega, S., Redmond, P.,

476 Royle, N. A., Pattie, A., Valdés Hernández, M., Corley, J., Aribisala, B. S., McIntosh, A. M.,

477 Wardlaw, J. M., & Deary, I. J. (2018). Brain cortical characteristics of lifetime cognitive

478 ageing. *Brain Structure and Function*, 223(1), 509–518. <https://doi.org/10.1007/s00429-017->

479 1505-0

- 480 de Brabander, J. M., Kramers, R. J. K., & Uylings, H. B. M. (1998). Layer-specific dendritic regression  
481 of pyramidal cells with ageing in the human prefrontal cortex. *European Journal of*  
482 *Neuroscience*, 10(4), 1261–1269. <https://doi.org/10.1046/j.1460-9568.1998.00137.x>
- 483 Deppe, M., Marinell, J., Krämer, J., Duning, T., Ruck, T., Simon, O. J., Zipp, F., Wiendl, H., & Meuth, S.  
484 G. (2014). Increased cortical curvature reflects white matter atrophy in individual patients  
485 with early multiple sclerosis. *NeuroImage: Clinical*, 6, 475–487.  
486 <https://doi.org/10.1016/j.nicl.2014.02.012>
- 487 Dickstein, D. L., Kabaso, D., Rocher, A. B., Luebke, J. I., Wearne, S. L., & Hof, P. R. (2007). Changes in  
488 the structural complexity of the aged brain. *Aging Cell*, 6(3), 275–284.  
489 <https://doi.org/10.1111/j.1474-9726.2007.00289.x>
- 490 Ecker, C., Marquand, A., Mourão-Miranda, J., Johnston, P., Daly, E. M., Brammer, M. J., Maltezos, S.,  
491 Murphy, C. M., Robertson, D., Williams, S. C., & Murphy, D. G. M. (2010). Describing the  
492 Brain in Autism in Five Dimensions—Magnetic Resonance Imaging-Assisted Diagnosis of  
493 Autism Spectrum Disorder Using a Multiparameter Classification Approach. *Journal of*  
494 *Neuroscience*, 30(32), 10612–10623. <https://doi.org/10.1523/JNEUROSCI.5413-09.2010>
- 495 Enders, C. K., & Mansolf, M. (2018). Assessing the fit of structural equation models with multiply  
496 imputed data. *Psychological Methods*, 23(1), 76–93. <https://doi.org/10.1037/met0000102>
- 497 Ferrer, E., Balluerka, N., & Widaman, K. F. (2008). Factorial invariance and the specification of  
498 second-order latent growth models. *Methodology: European Journal of Research Methods*  
499 *for the Behavioral and Social Sciences*, 4(1), 22–36. [https://doi.org/10.1027/1614-](https://doi.org/10.1027/1614-2241.4.1.22)  
500 [2241.4.1.22](https://doi.org/10.1027/1614-2241.4.1.22)
- 501 Ferrer, E., & McArdle, J. J. (2010). Longitudinal Modeling of Developmental Changes in Psychological  
502 Research. *Current Directions in Psychological Science*, 19(3), 149–154.  
503 <https://doi.org/10.1177/0963721410370300>
- 504 Fischl, B. (2012). FreeSurfer. *NeuroImage*, 62(2), 774–781.  
505 <https://doi.org/10.1016/j.neuroimage.2012.01.021>



- 506 Fjell, A. M., Westlye, L. T., Amlien, I., Tamnes, C. K., Grydeland, H., Engvig, A., Espeseth, T., Reinvang,  
507 I., Lundervold, A. J., Lundervold, A., & Walhovd, K. B. (2015). High-expanding cortical regions  
508 in human development and evolution are related to higher intellectual abilities. *Cerebral*  
509 *Cortex (New York, N.Y.: 1991)*, 25(1), 26–34. <https://doi.org/10.1093/cercor/bht201>
- 510 Fotenos, A. F., Snyder, A. Z., Girton, L. E., Morris, J. C., & Buckner, R. L. (2005). Normative estimates  
511 of cross-sectional and longitudinal brain volume decline in aging and AD. *Neurology*, 64(6),  
512 1032–1039. <https://doi.org/10.1212/01.WNL.0000154530.72969.11>
- 513 Gerrits, N. J. H. M., van Loenhoud, A. C., van den Berg, S. F., Berendse, H. W., Foncke, E. M. J., Klein,  
514 M., Stoffers, D., van der Werf, Y. D., & van den Heuvel, O. A. (2016). Cortical Thickness,  
515 Surface Area and Subcortical Volume Differentially Contribute to Cognitive Heterogeneity in  
516 Parkinson’s Disease. *PLoS ONE*, 11(2). <https://doi.org/10.1371/journal.pone.0148852>
- 517 Greenwood, P. M. (2000). The frontal aging hypothesis evaluated. *Journal of the International*  
518 *Neuropsychological Society*, 6(6), 705–726. <https://doi.org/10.1017/S1355617700666092>
- 519 Gunning-Dixon, F. M., Brickman, A. M., Cheng, J. C., & Alexopoulos, G. S. (2009). Aging of Cerebral  
520 White Matter: A Review of MRI Findings. *International Journal of Geriatric Psychiatry*, 24(2),  
521 109–117. <https://doi.org/10.1002/gps.2087>
- 522 Hofer, E., Roshchupkin, G. V., Adams, H. H. H., Knol, M. J., Lin, H., Li, S., Zare, H., Ahmad, S.,  
523 Armstrong, N. J., Satizabal, C. L., Bernard, M., Bis, J. C., Gillespie, N. A., Luciano, M., Mishra,  
524 A., Scholz, M., Teumer, A., Xia, R., Jian, X., ... Seshadri, S. (2020). Genetic correlations and  
525 genome-wide associations of cortical structure in general population samples of 22,824  
526 adults. *Nature Communications*, 11(1), 4796. <https://doi.org/10.1038/s41467-020-18367-y>
- 527 Hogstrom, L. J., Westlye, L. T., Walhovd, K. B., & Fjell, A. M. (2013). The structure of the cerebral  
528 cortex across adult life: Age-related patterns of surface area, thickness, and gyrification.  
529 *Cerebral Cortex (New York, N.Y.: 1991)*, 23(11), 2521–2530.  
530 <https://doi.org/10.1093/cercor/bhs231>

- 531 Hutton, C., Draganski, B., Ashburner, J., & Weiskopf, N. (2009). A comparison between voxel-based  
532 cortical thickness and voxel-based morphometry in normal aging. *NeuroImage*, *48*(2), 371–  
533 380. <https://doi.org/10.1016/j.neuroimage.2009.06.043>
- 534 Im, K., Lee, J.-M., Won Seo, S., Hyung Kim, S., Kim, S. I., & Na, D. L. (2008). Sulcal morphology  
535 changes and their relationship with cortical thickness and gyral white matter volume in mild  
536 cognitive impairment and Alzheimer’s disease. *NeuroImage*, *43*(1), 103–113.  
537 <https://doi.org/10.1016/j.neuroimage.2008.07.016>
- 538 Jacobs, B., Schall, M., Prather, M., Kapler, E., Driscoll, L., Baca, S., Jacobs, J., Ford, K., Wainwright, M.,  
539 & Trembl, M. (2001). Regional Dendritic and Spine Variation in Human Cerebral Cortex: A  
540 Quantitative Golgi Study. *Cerebral Cortex*, *11*(6), 558–571.  
541 <https://doi.org/10.1093/cercor/11.6.558>
- 542 Jin, K., Zhang, T., Shaw, M., Sachdev, P., & Cherbuin, N. (2018). Relationship Between Sulcal  
543 Characteristics and Brain Aging. *Frontiers in Aging Neuroscience*, *10*.  
544 <https://doi.org/10.3389/fnagi.2018.00339>
- 545 Jung, R. E., & Haier, R. J. (2007). The Parieto-Frontal Integration Theory (P-FIT) of intelligence:  
546 Converging neuroimaging evidence. *Behavioral and Brain Sciences*, *30*(02), 135.  
547 <https://doi.org/10.1017/S0140525X07001185>
- 548 Klein, A., Ghosh, S. S., Forrest, B. S., Giard, J., Haeme, Y., Stavsky, E., Lee, N., Rossa, B., Reuter, M.,  
549 Neto, E. C., & Keshavan, A. (2017). Mindboggling morphometry of human brains. *PLOS*  
550 *Computational Biology*, *13*(2).
- 551 Klein, A., & Tourville, J. (2012). 101 Labeled Brain Images and a Consistent Human Cortical Labeling  
552 Protocol. *Frontiers in Neuroscience*, *6*. <https://doi.org/10.3389/fnins.2012.00171>
- 553 Lemaitre, H., Goldman, A. L., Sambataro, F., Verchinski, B. A., Meyer-Lindenberg, A., Weinberger, D.  
554 R., & Mattay, V. S. (2012). Normal age-related brain morphometric changes: Nonuniformity  
555 across cortical thickness, surface area and gray matter volume? *Neurobiology of Aging*,  
556 *33*(3), 617.e1-617.e9. <https://doi.org/10.1016/j.neurobiolaging.2010.07.013>

- 557 Lövdén, M., Wenger, E., Mårtensson, J., Lindenberger, U., & Bäckman, L. (2013). Structural brain  
558 plasticity in adult learning and development. *Neuroscience & Biobehavioral Reviews*, *37*(9,  
559 Part B), 2296–2310. <https://doi.org/10.1016/j.neubiorev.2013.02.014>
- 560 Madan, C. R. (2021). Age-related decrements in cortical gyrification: Evidence from an accelerated  
561 longitudinal dataset. *The European Journal of Neuroscience*, *53*(5), 1661–1671.  
562 <https://doi.org/10.1111/ejn.15039>
- 563 Madan, C. R., & Kensinger, E. A. (2016). Cortical complexity as a measure of age-related brain  
564 atrophy. *NeuroImage*, *134*, 617–629.
- 565 McArdle, J. J., & Hamagami, F. (2001). Latent difference score structural models for linear dynamic  
566 analyses with incomplete longitudinal data. In *New methods for the analysis of change* (pp.  
567 139–175). American Psychological Association. <https://doi.org/10.1037/10409-005>
- 568 McArdle, J. J., & Nesselroade, J. R. (2003). Growth curve analysis in contemporary psychological  
569 research. In *Handbook of psychology: Research methods in psychology, Vol. 2.* (pp. 447–480).  
570 John Wiley & Sons Inc.
- 571 McKay, D. R., Knowles, E. E. M., Winkler, A. A. M., Sprooten, E., Kochunov, P., Olvera, R. L., Curran, J.  
572 E., Kent, J. W., Carless, M. A., Göring, H. H. H., Dyer, T. D., Duggirala, R., Almasy, L., Fox, P. T.,  
573 Blangero, J., & Glahn, D. C. (2014). Influence of age, sex and genetic factors on the human  
574 brain. *Brain Imaging and Behavior*, *8*(2), 143–152. [https://doi.org/10.1007/s11682-013-](https://doi.org/10.1007/s11682-013-9277-5)  
575 [9277-5](https://doi.org/10.1007/s11682-013-9277-5)
- 576 Nakamura, S., Akiguchi, I., Kameyama, M., & Mizuno, N. (1985). Age-related changes of pyramidal  
577 cell basal dendrites in layers III and V of human motor cortex: A quantitative Golgi study.  
578 *Acta Neuropathologica*, *65*(3), 281–284. <https://doi.org/10.1007/BF00687009>
- 579 Norbom, L. B., Ferschmann, L., Parker, N., Agartz, I., Andreassen, O. A., Paus, T., Westlye, L. T., &  
580 Tamnes, C. K. (2021). New insights into the dynamic development of the cerebral cortex in  
581 childhood and adolescence: Integrating macro- and microstructural MRI findings. *Progress in*  
582 *Neurobiology*, 102109. <https://doi.org/10.1016/j.pneurobio.2021.102109>

- 583 Nowakowski, T. J., Pollen, A. A., Sandoval-Espinosa, C., & Kriegstein, A. R. (2016). Transformation of  
584 the Radial Glia Scaffold Demarcates Two Stages of Human Cerebral Cortex Development.  
585 *Neuron*, 91(6), 1219–1227. <https://doi.org/10.1016/j.neuron.2016.09.005>
- 586 Oswald, J., Guye, S., Liem, F., Rast, P., Willis, S., Röcke, C., Jäncke, L., Martin, M., & Mérillat, S.  
587 (2020). Brain structure and cognitive ability in healthy aging: A review on longitudinal  
588 correlated change. *Reviews in the Neurosciences*, 31(1), 1–57.  
589 <https://doi.org/10.1515/revneuro-2018-0096>
- 590 Panizzon, M. S., Fennema-Notestine, C., Eyler, L. T., Jernigan, T. L., Prom-Wormley, E., Neale, M.,  
591 Jacobson, K., Lyons, M. J., Grant, M. D., Franz, C. E., Xian, H., Tsuang, M., Fischl, B., Seidman,  
592 L., Dale, A., & Kremen, W. S. (2009). Distinct genetic influences on cortical surface area and  
593 cortical thickness. *Cerebral Cortex (New York, N.Y.: 1991)*, 19(11), 2728–2735.  
594 <https://doi.org/10.1093/cercor/bhp026>
- 595 Pantazis, D., Joshi, A., Jiang, J., Shattuck, D. W., Bernstein, L. E., Damasio, H., & Leahy, R. M. (2010).  
596 Comparison of landmark-based and automatic methods for cortical surface registration.  
597 *NeuroImage*, 49(3), 2479–2493. <https://doi.org/10.1016/j.neuroimage.2009.09.027>
- 598 Peters, A. (2007). The Effects of Normal Aging on Nerve Fibers and Neuroglia in the Central Nervous  
599 System. In D. R. Riddle (Ed.), *Brain Aging: Models, Methods, and Mechanisms*. CRC  
600 Press/Taylor & Francis. <http://www.ncbi.nlm.nih.gov/books/NBK3873/>
- 601 Rakic, P. (2000). Radial unit hypothesis of neocortical expansion. *Novartis Foundation Symposium*,  
602 228, 30–42; discussion 42–52. <https://doi.org/10.1002/0470846631.ch3>
- 603 Raz, N. (2005). The Aging Brain Observed in Vivo: Differential Changes and Their Modifiers. In  
604 *Cognitive neuroscience of aging: Linking cognitive and cerebral aging* (pp. 19–57). Oxford  
605 University Press.
- 606 Reuter, M., Schmansky, N. J., Rosas, H. D., & Fischl, B. (2012). Within-subject template estimation for  
607 unbiased longitudinal image analysis. *NeuroImage*, 61(4), 1402–1418.  
608 <https://doi.org/10.1016/j.neuroimage.2012.02.084>

- 609 Scheltens, P., Barkhof, F., Leys, D., Wolters, E. C., Ravid, R., & Kamphorst, W. (1995). Histopathologic  
610 correlates of white matter changes on MRI in Alzheimer's disease and normal aging.  
611 *Neurology*, 45(5), 883–888. <https://doi.org/10.1212/WNL.45.5.883>
- 612 Shafto, M. A., Tyler, L. K., Dixon, M., Taylor, J. R., Rowe, J. B., Cusack, R., Calder, A. J., Marslen-  
613 Wilson, W. D., Duncan, J., Dalgleish, T., Henson, R. N., Brayne, C., & Matthews, F. E. (2014).  
614 The Cambridge Centre for Ageing and Neuroscience (Cam-CAN) study protocol: A cross-  
615 sectional, lifespan, multidisciplinary examination of healthy cognitive ageing. *BMC*  
616 *Neurology*, 14, 204. <https://doi.org/10.1186/s12883-014-0204-1>
- 617 Shimony, J. S., Smyser, C. D., Wideman, G., Alexopoulos, D., Hill, J., Harwell, J., Dierker, D., Van Essen,  
618 D. C., Inder, T. E., & Neil, J. J. (2016). Comparison of cortical folding measures for evaluation  
619 of developing human brain. *NeuroImage*, 125, 780–790.  
620 <https://doi.org/10.1016/j.neuroimage.2015.11.001>
- 621 Steiger, J. H. (1980). Tests for comparing elements of a correlation matrix. *Psychological Bulletin*,  
622 87(2), 245–251. <https://doi.org/10.1037/0033-2909.87.2.245>
- 623 Storsve, A. B., Fjell, A. M., Tamnes, C. K., Westlye, L. T., Overbye, K., Aasland, H. W., & Walhovd, K. B.  
624 (2014). Differential longitudinal changes in cortical thickness, surface area and volume  
625 across the adult life span: Regions of accelerating and decelerating change. *The Journal of*  
626 *Neuroscience: The Official Journal of the Society for Neuroscience*, 34(25), 8488–8498.  
627 <https://doi.org/10.1523/JNEUROSCI.0391-14.2014>
- 628 Streiner, D. L. (2005). Finding Our Way: An Introduction to Path Analysis. *The Canadian Journal of*  
629 *Psychiatry*, 50(2), 115–122. <https://doi.org/10.1177/070674370505000207>
- 630 Taylor, J. R., Williams, N., Cusack, R., Auer, T., Shafto, M. A., Dixon, M., Tyler, L. K., Cam-CAN, &  
631 Henson, R. N. (2017). The Cambridge Centre for Ageing and Neuroscience (Cam-CAN) data  
632 repository: Structural and functional MRI, MEG, and cognitive data from a cross-sectional  
633 adult lifespan sample. *NeuroImage*, 144, 262–269.  
634 <https://doi.org/10.1016/j.neuroimage.2015.09.018>

- 635 van der Meer, D., Frei, O., Kaufmann, T., Chen, C.-H., Thompson, W. K., O'Connell, K. S., Monereo  
636 Sánchez, J., Linden, D. E. J., Westlye, L. T., Dale, A. M., & Andreassen, O. A. (2020).  
637 Quantifying the Polygenic Architecture of the Human Cerebral Cortex: Extensive Genetic  
638 Overlap between Cortical Thickness and Surface Area. *Cerebral Cortex*, 30(10), 5597–5603.  
639 <https://doi.org/10.1093/cercor/bhaa146>
- 640 Walhovd, K. B., Fjell, A. M., Giedd, J., Dale, A. M., & Brown, T. T. (2017). Through Thick and Thin: A  
641 Need to Reconcile Contradictory Results on Trajectories in Human Cortical Development.  
642 *Cerebral Cortex (New York, N.Y.: 1991)*, 27(2), 1472–1481.  
643 <https://doi.org/10.1093/cercor/bhv301>
- 644 Walhovd, K. B., Fjell, A. M., Westerhausen, R., Nyberg, L., Ebmeier, K. P., Lindenberger, U., Bartrés-  
645 Faz, D., Baaré, W. F. C., Siebner, H. R., Henson, R., Drevon, C. A., Strømstad Knudsen, G. P.,  
646 Ljøsne, I. B., Penninx, B. W. J. H., Ghisletta, P., Rogeberg, O., Tyler, L., Bertram, L., & Lifebrain  
647 Consortium. (2018). Healthy minds 0-100 years: Optimising the use of European brain  
648 imaging cohorts ('Lifebrain'). *European Psychiatry: The Journal of the Association of*  
649 *European Psychiatrists*, 50, 47–56. <https://doi.org/10.1016/j.eurpsy.2017.12.006>
- 650 Walhovd, K. B., Krogstad, S. K., Amlie, I. K., Bartsch, H., Bjørnerud, A., Due-Tønnessen, P.,  
651 Grydeland, H., Hagler, D. J., Håberg, A. K., Kremen, W. S., Ferschmann, L., Nyberg, L.,  
652 Panizzon, M. S., Rohani, D. A., Skranes, J., Storsve, A. B., Sørnes, A. E., Tamnes, C. K.,  
653 Thompson, W. K., ... Fjell, A. M. (2016). Neurodevelopmental origins of lifespan changes in  
654 brain and cognition. *Proceedings of the National Academy of Sciences of the United States of*  
655 *America*, 113(33), 9357–9362. <https://doi.org/10.1073/pnas.1524259113>
- 656 Wang, Y., Hao, L., Zhang, Y., Zuo, C., & Wang, D. (2019). Entorhinal cortex volume, thickness, surface  
657 area and curvature trajectories over the adult lifespan. *Psychiatry Research: Neuroimaging*,  
658 292, 47–53. <https://doi.org/10.1016/j.psychres.2019.09.002>

- 659 Widaman, K. F., Ferrer, E., & Conger, R. D. (2010). Factorial Invariance within Longitudinal Structural  
660 Equation Models: Measuring the Same Construct across Time. *Child Development Perspectives*, 4(1), 10–18. <https://doi.org/10.1111/j.1750-8606.2009.00110.x>  
661
- 662 Wierenga, L. M., Langen, M., Oranje, B., & Durston, S. (2014). Unique developmental trajectories of  
663 cortical thickness and surface area. *NeuroImage*, 87, 120–126.  
664 <https://doi.org/10.1016/j.neuroimage.2013.11.010>
- 665 Winkler, A. M., Greve, D. N., Bjuland, K. J., Nichols, T. E., Sabuncu, M. R., Håberg, A. K., Skranes, J., &  
666 Rimol, L. M. (2018). Joint Analysis of Cortical Area and Thickness as a Replacement for the  
667 Analysis of the Volume of the Cerebral Cortex. *Cerebral Cortex (New York, NY)*, 28(2), 738–  
668 749. <https://doi.org/10.1093/cercor/bhx308>
- 669 Winkler, A. M., Kochunov, P., Blangero, J., Almasy, L., Zilles, K., Fox, P. T., Duggirala, R., & Glahn, D. C.  
670 (2010). Cortical thickness or grey matter volume? The importance of selecting the  
671 phenotype for imaging genetics studies. *NeuroImage*, 53(3), 1135–1146.  
672 <https://doi.org/10.1016/j.neuroimage.2009.12.028>
- 673  
674



## Borgeest et al. (2021): Supplementary Materials

### 1. Descriptive Statistics

| Cam-CAN      | N   | Mean    | SD     | Median  | Min     | Max     | Skew  | Kurtosis |
|--------------|-----|---------|--------|---------|---------|---------|-------|----------|
| Age          | 641 | 54.04   | 18.56  | 54.00   | 18.00   | 88.00   | -0.05 | -1.15    |
| WB Volume    | 641 | 7114.64 | 899.87 | 7034.19 | 930.07  | 4939.80 | 0.36  | -0.17    |
| WB Area      | 641 | 3177.87 | 320.97 | 3157.00 | 2442.25 | 4445.75 | 0.38  | 0.09     |
| WB Thickness | 641 | 2.66    | 0.12   | 2.67    | 2.19    | 2.98    | -0.50 | 0.87     |
| Cattell      | 622 | 31.05   | 6.74   | 33.00   | 11.00   | 44.00   | -0.56 | -0.16    |

Table 1: Descriptive statistics for Cam-CAN data

| LCBC            | N    | Mean    | SD     | Median  | Min     | Max     | Skew  | Kurtosis |
|-----------------|------|---------|--------|---------|---------|---------|-------|----------|
| Age             | 1236 | 41.55   | 20.32  | 31.95   | 18.0    | 93.35   | 0.71  | -1.02    |
| WB Volume       | 1188 | 7453.09 | 853.41 | 7441.81 | 890.39  | 5092.91 | 0.14  | -0.41    |
| WB Area         | 1188 | 2630.76 | 246.85 | 2618.33 | 1859.63 | 3300.62 | 0.15  | -0.32    |
| WB Thickness    | 1199 | 2.60    | 0.11   | 2.61    | 2.09    | 2.91    | -0.38 | -0.03    |
| Wasi Matrix Raw | 1234 | 27.67   | 4.64   | 20.00   | 6.00    | 35.00   | -.69  | 4.06     |

Table 2: Descriptive statistics for LCBC data

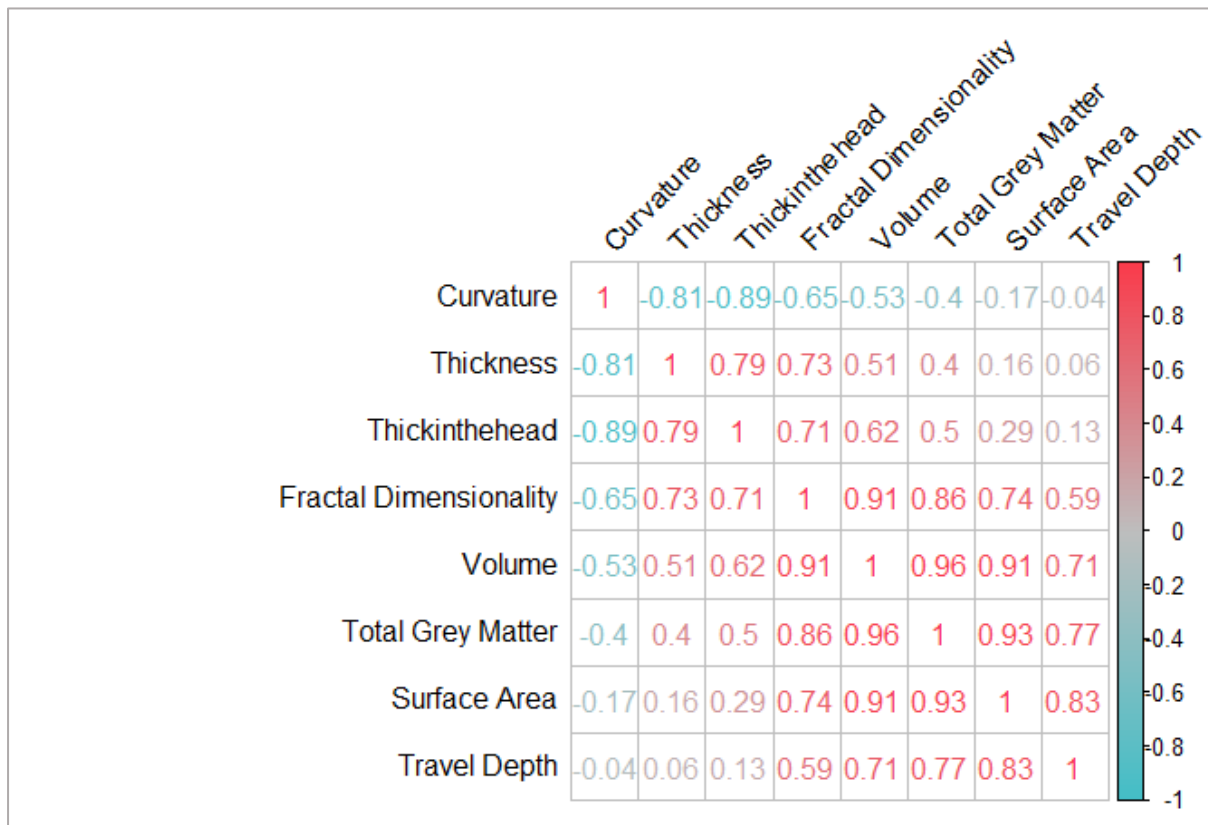

Figure 1: Correlation matrix of the eight brain structure metrics. Note that surface area and thickness are correlated  $r = 0.16$

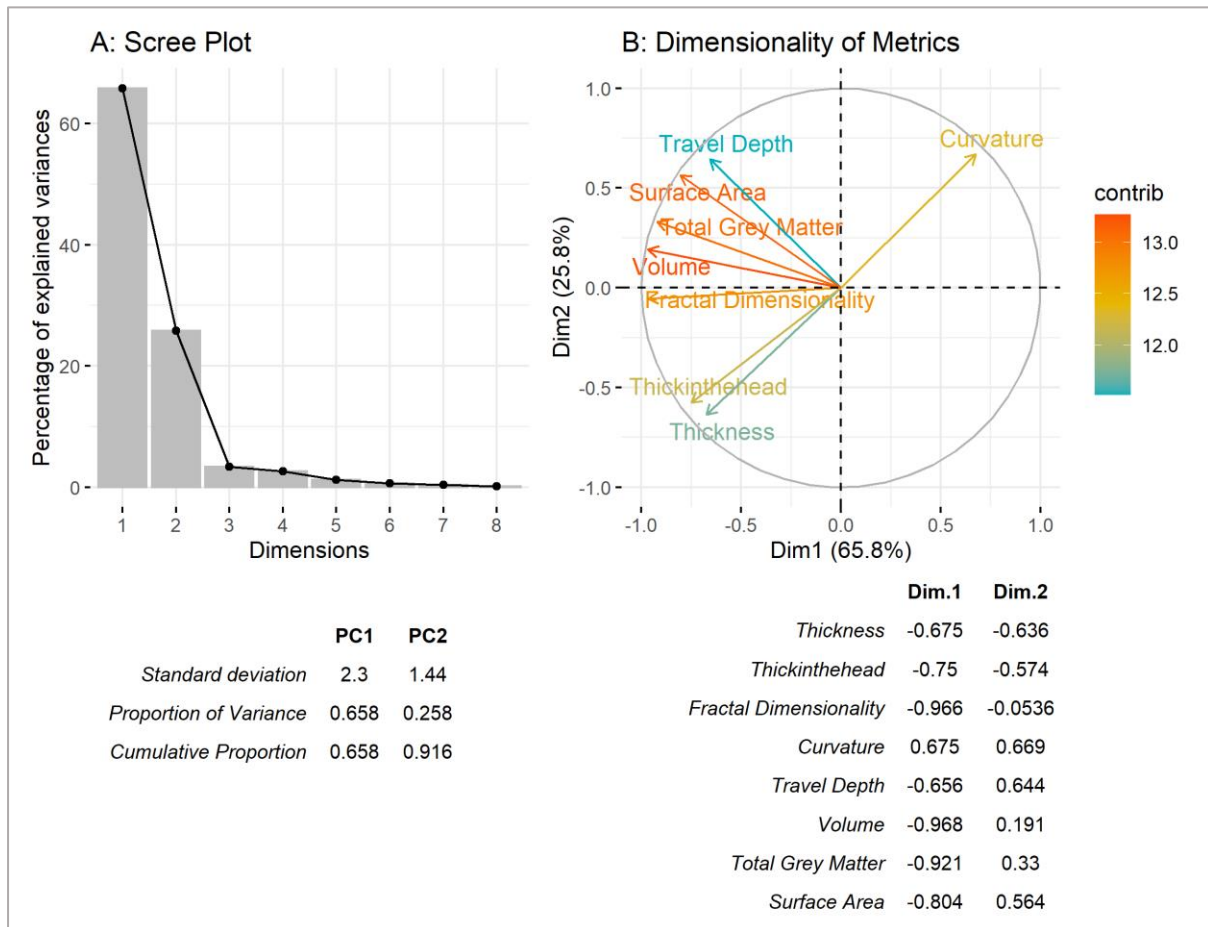

Figure 2: Results of Principal Component Analysis

## 2. Imaging data acquisition and pre-processing

We based our quality control process on the supervised learning tool ‘Qoala-T’ developed by Klapwijk et al., which was originally developed for child and adolescent samples (see manual, 2019a, and manuscript, 2019b). First, we manually rated the quality of 12% of our FreeSurfer pre-processed Cam-CAN scans, thereby surpassing the proportion of 10% as recommended by the Qoala-T authors. These scans later served as input for Qoala-T, so the algorithm would learn to distinguish between scan qualities suitable or unsuitable for further analyses. Second, following the manual ratings, we used Qoala-T’s publicly available quality control tool to assess the quality of all T1 CamCAN images. This resulted in six participants being excluded from the sample (age 32 – 71, median = 59).

We have uploaded a detailed rating procedure to this project's OSF page ([link here](#)) as we hope that it will help other researchers implement versions of this semi-automatic quality control procedure for large adult lifespan samples.

## 2 Whole Brain Correlations

| Correlation               |           | CamCAN |        | LCBC |        |
|---------------------------|-----------|--------|--------|------|--------|
|                           |           | R      | p      | R    | p      |
| Age                       | Volume    | -.62   | <.0001 | -.64 | <.0001 |
|                           | Thickness | -.6    | <.0001 | -.78 | <.0001 |
|                           | Area      | -.36   | <.0001 | -.34 | <.0001 |
| Fluid Intelligence        | Volume    | .56    | <.0001 | .41  | <.0001 |
|                           | Thickness | .42    | <.0001 | .45  | <.0001 |
|                           | Area      | .39    | <.0001 | .28  | <.0001 |
| Age-residualized<br>FIdIn | Volume    | 0.2    | <.0001 | .15  | <.0001 |
|                           | Thickness | .039   | .33    | .077 | .0009  |
|                           | Area      | 0.21   | <.0001 | .13  | <.0001 |

Table 3: Comparing whole brain correlations in CamCAN and LCBC data

| Metric                      | Model       | R-Squared | F-Statistic | p      | BIC      |
|-----------------------------|-------------|-----------|-------------|--------|----------|
| Cortical<br>Volume          | Linear      | 0.38      | 399.7       | <0.001 | 5270.861 |
|                             | Quadratic * | 0.39      | 206.2       | <0.001 | 5269.154 |
| Cortical<br>Thickness       | Linear *    | 0.36      | 366.2       | <0.001 | 5291.885 |
|                             | Quadratic   | 0.37      | 184.2       | <0.001 | 5296.544 |
| Surface Area                | Linear *    | 0.13      | 96.94       | <0.001 | 5491.733 |
|                             | Quadratic   | 0.13      | 48.56       | <0.001 | 5497.909 |
| Thickinthehead              | Linear *    | 0.71      | 1538        | <0.001 | 4796.678 |
|                             | Quadratic   | 0.71      | 768.2       | <0.001 | 4802.762 |
| Curvature                   | Linear      | 0.60      | 955.2       | <0.001 | 4996.165 |
|                             | Quadratic * | 0.63      | 532.4       | <0.001 | 4959.439 |
| Sulcal Depth                | Linear *    | 0.14      | 106.2       | <0.001 | 5483.685 |
|                             | Quadratic   | 0.14      | 53.17       | <0.001 | 5489.911 |
| Grey Matter<br>Volume (SPM) | Linear *    | 0.30      | 269.4       | <0.001 | 5356.77  |
|                             | Quadratic   | 0.30      | 135.2       | <0.001 | 5361.933 |
| Fractal<br>Dimensionality   | Linear *    | 0.42      | 467.6       | <0.001 | 5230.34  |
|                             | Quadratic   | 0.42      | 234.1       | <0.001 | 5235.915 |

Table 4: Comparing linear and quadratic model fit for the metric-age correlations in CamCAN. The best fitting model (with lower BIC) is marked with \*.

### 3 Frequentist modelling approach

We examined whether the different metrics of brain structure provided unique and complementary information about age and cognitive ability. To do so, we ran frequentist path models and Bayesian model selection framework in which cortical thickness and surface area predicted either age, fluid intelligence or age-adjusted fluid intelligence (ignoring volume since this is the product of thickness and surface area). These revealed that the best model of age and fluid intelligence required both surface area and thickness (Figure 1 A-B). In contrast, individual differences in (age-residualized) fluid intelligence were best captured by surface area alone (Figure 1 C). These models explained 44, 29 and 4 percent of the variance of age, fluid intelligence and age-residualized fluid intelligence, respectively. The Bayesian model selection – which led to identical conclusions – is plotted in the supplementary materials.

The full models that included all 8 metrics are depicted in Figure 1 D-F. The total variance explained by these models was 76, 46 and 7 percent for age, fluid intelligence and age-residualized fluid intelligence, respectively – almost double the variance explained by thickness and area alone. Moreover, the fact that multiple morphometric measures provided partially complementary information about the outcome highlights the potential usefulness in assessing various morphological shape measures when investigating the ageing brain and cognitive abilities. As was the case for the first set of models, the Bayesian model selection arrived at the same conclusions as the frequentist model selection (see supplementary materials): For age, the best model included Thickness, Thickinthehead, Curvature, TGM and Surface Area. Fluid intelligence was best captured by Thickinthehead, Curvature, TGM, Surface Area, Thickness and FD. Finally, the best model for age-residualized fluid intelligence included Fractal Dimensionality and Thickness. Interestingly, when FD was not included in the models, the best model for age-residualized fluid intelligence included surface area only, suggesting that surface area and FD capture similar variance.

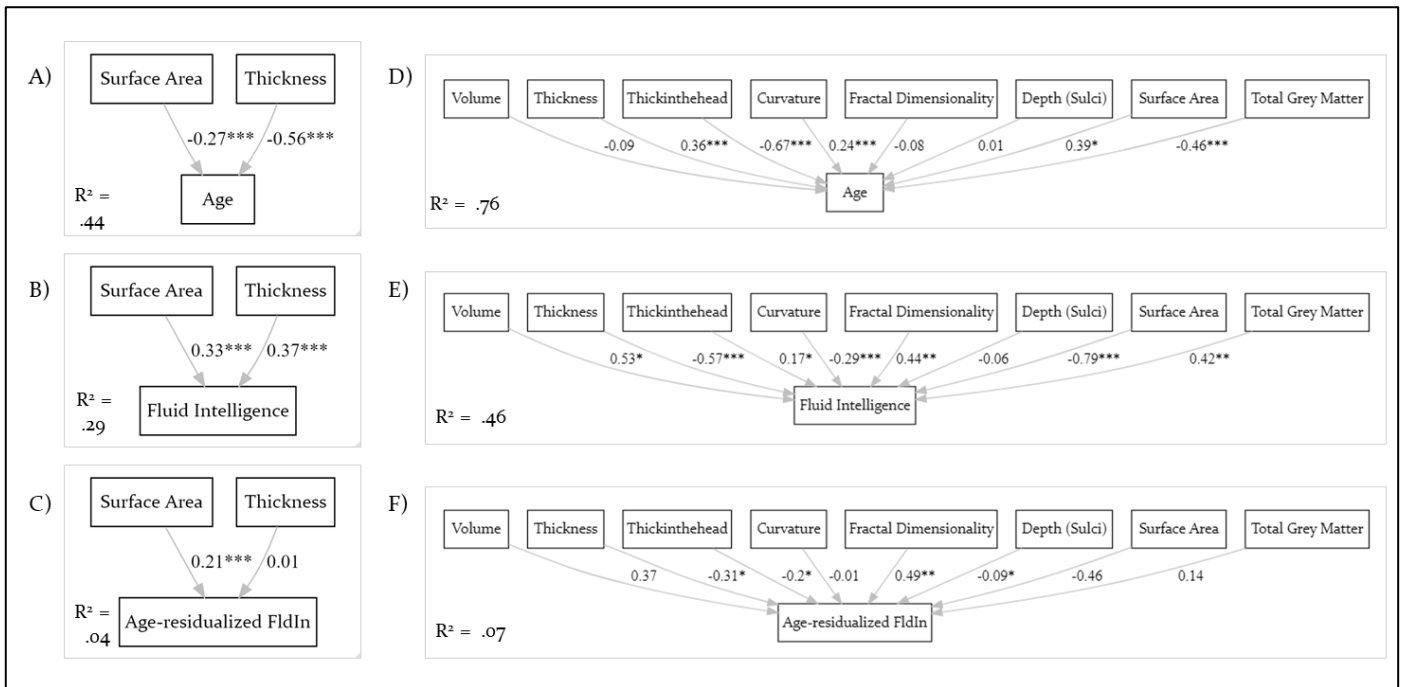

Figure 3: CamCAN path model results. Models A-C were for the area and thickness only, models D-F included all eight brain structure metrics.

#### 4 Bayesian model selection

We validated our frequentist modelling approach with a Bayesian modelling framework (Rouder et al., 2012) using Bayesian regression. As before in this cohort (Gadie et al., 2017), we used the default, symmetric Cauchy prior with width of  $\frac{\sqrt{2}}{2}$  which translates to a 50% confidence that the true effect will lie between  $-0.707$  and  $0.707$ . Doing so yields a Bayes factor for all possible subsets of predictors, thus yielding the model that optimally balances parsimony (excluding unnecessary predictors) with prediction power.

All Bayesian models confirmed the frequentist ones. For age, the best model was comprised of Thickkinthead, Curvature, TGM, Surface Area and Thickness (Figure 2). Fluid intelligence was best captured by Curvature, TGM, Surface Area, Thickness, FD and Volume (Figure 3). Finally, age-residualized fluid intelligence was best predicted by FD and Thickness (Figure 4).

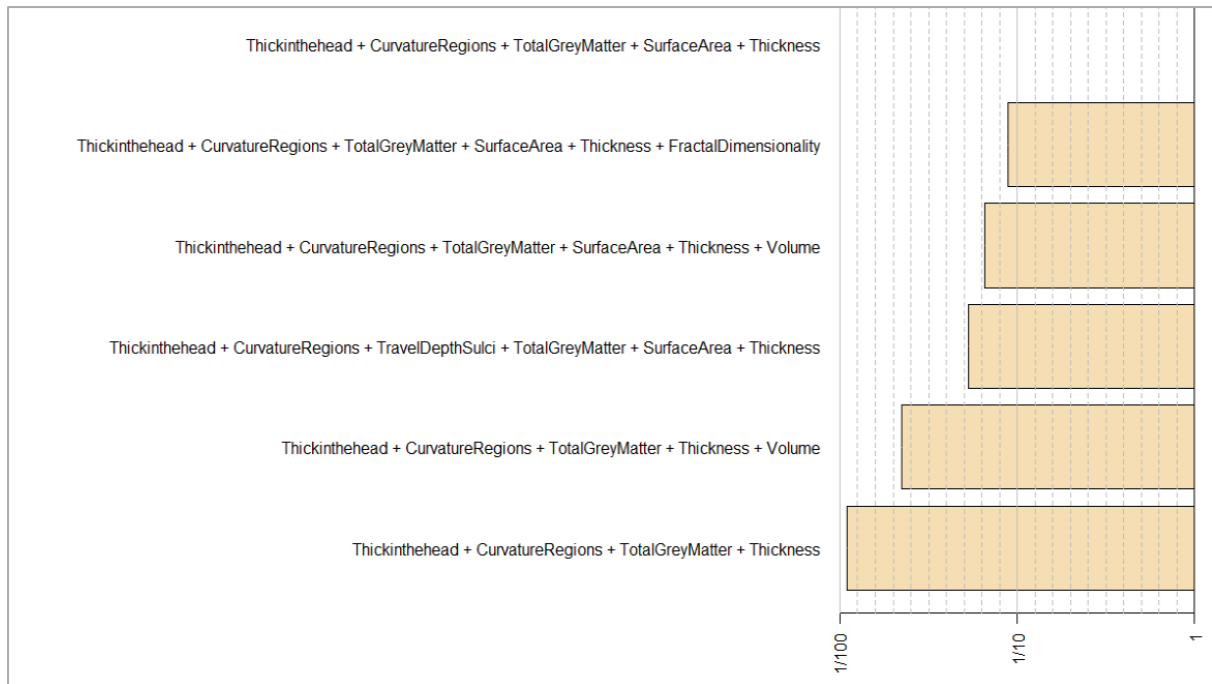

Figure 4: Bayesian model selection framework, predicting Age in CamCAN. Compares the best model (top row) to the next five best fitting models.

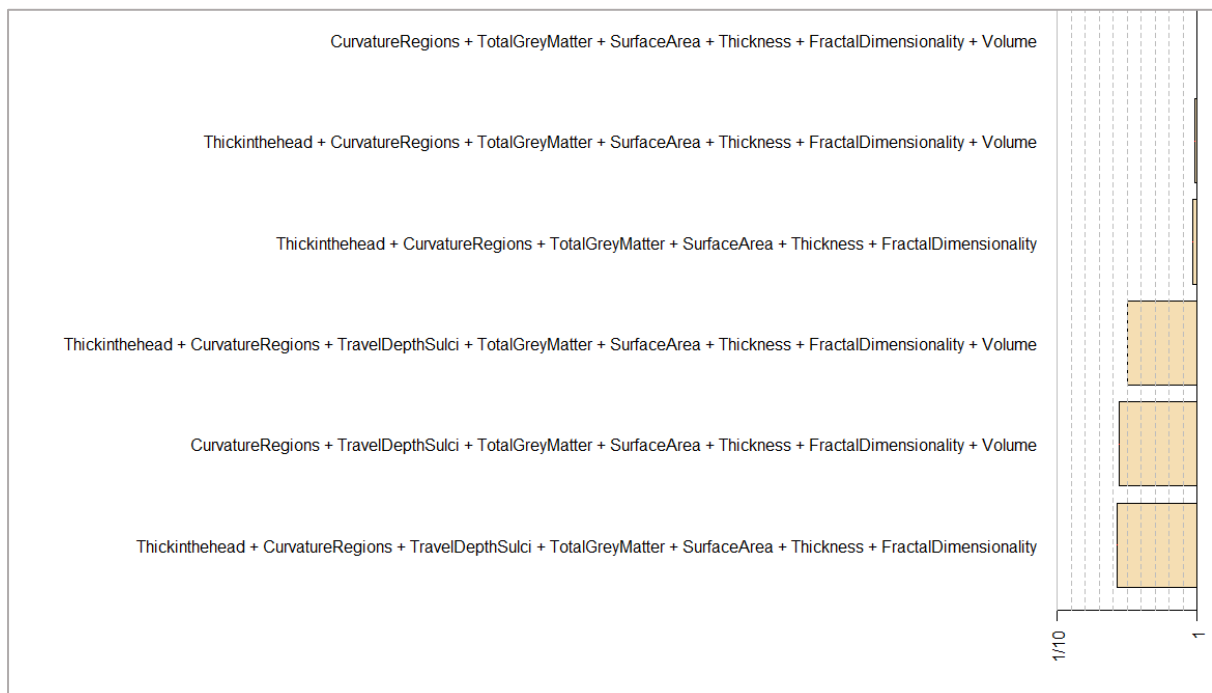

Figure 5: Bayesian model selection framework, predicting fluid intelligence in CamCAN. Compares the best model (top row) to the next five best fitting models.

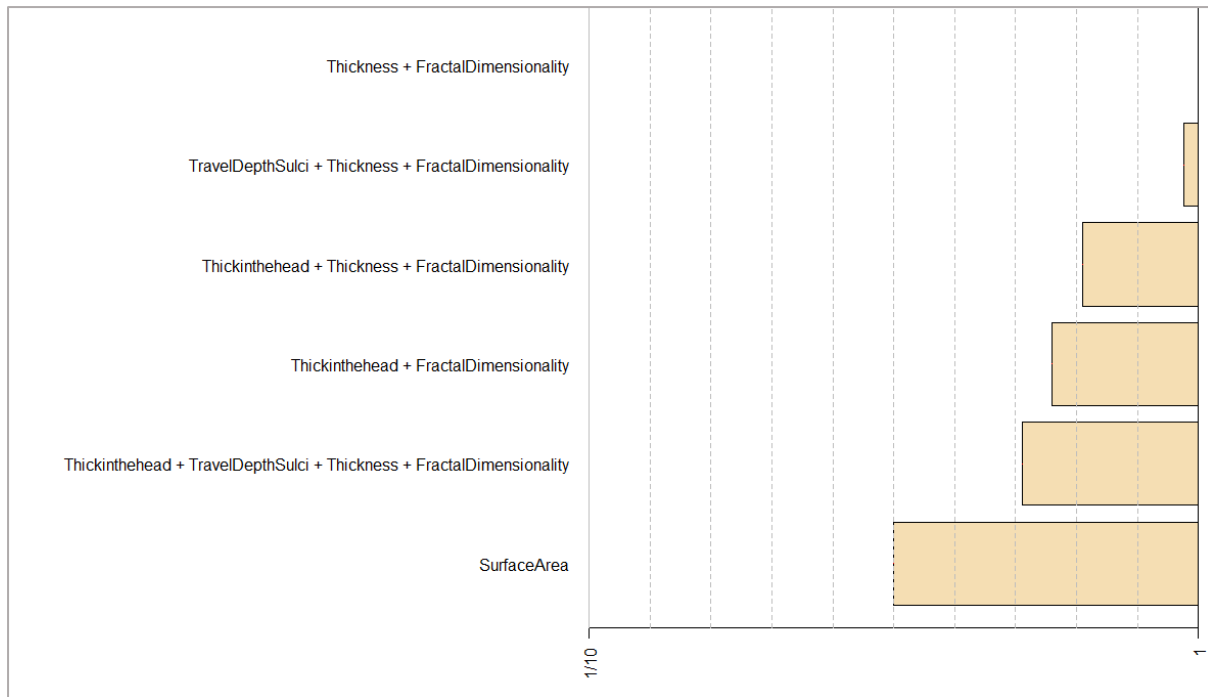

Figure 6: Bayesian model selection framework, predicting age-residualized fluid intelligence in CamCAN. Compares the best model (top row) to the next five best fitting models.

## 5 Regional results

In Cam-CAN, after looking at whole brain correlations between the eight metrics and age, fluid intelligence and age-residualized fluid intelligence, we investigated regional correlations. Regions were assigned 62 labels following the Desikan-Killiany-Tourville (DKT) protocol in the Mindboggle pipeline (Klein et al., 2018). We then averaged across both hemispheres. Results are shown in Tables 4-6 and plotted in Figures 4-6. Note that data for the entorhinal, banks superior temporal and temporal pole was only available for Thickinthehead and Volume.

Our regional investigations further supported the morphological dichotomy found in the whole brain analyses. For cortical thickness, all 32 brain regions (averaged across the hemispheres) were significantly correlated with age (all correlations were FDR corrected at  $\alpha = 0.05$ ), while not a single region predicted age-residualized fluid intelligence (Figure 3 and Tables 4-6 in supplementary materials). In contrast, for surface area, *all* regions were significantly associated with age-residualized fluid intelligence. While regional surface area also correlated with age, the correlations were substantially weaker than the brain-age correlations for cortical thickness.



The precentral gyrus was the region with the strongest age effects in five out of eight metrics: curvature ( $r=.74$ ), thickness ( $r=-.66$ ), thickinthead ( $r=-.87$ ), volume ( $r=-.71$ ), TGM ( $r=-.66$ ). More regional results are shown in Tables 4-6 and Figures 4-6 in the supplementary materials.

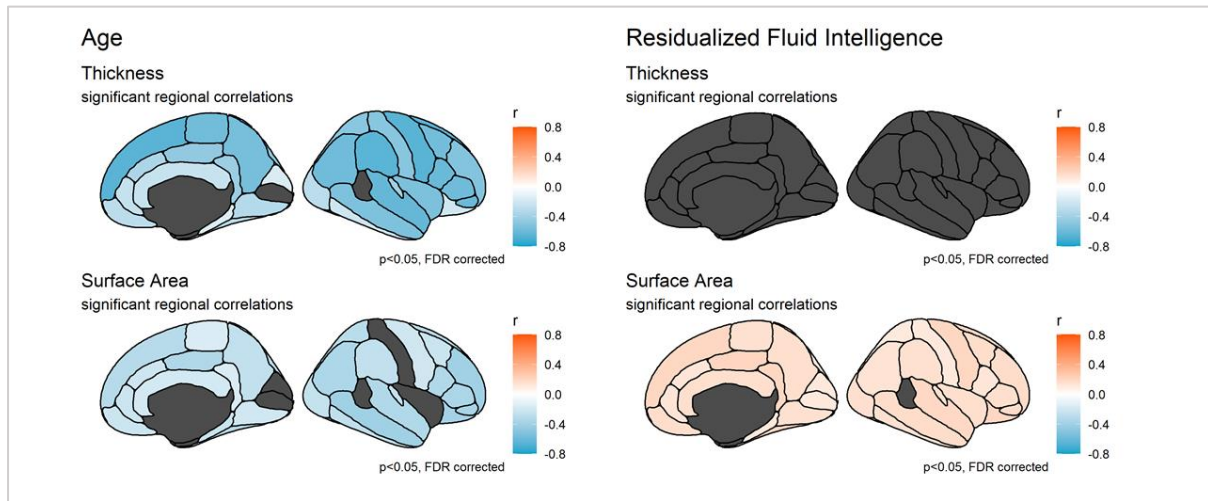

Figure 7: Significant regional age- and age-residualized fluid intelligence correlations. Correlations are FDR corrected at  $\alpha = 0.05$ . Shows a double dissociation, whereby cortical thickness predicts age and not cognition, and vice versa for surface area. Note that grey indicates non-significant or missing regions.

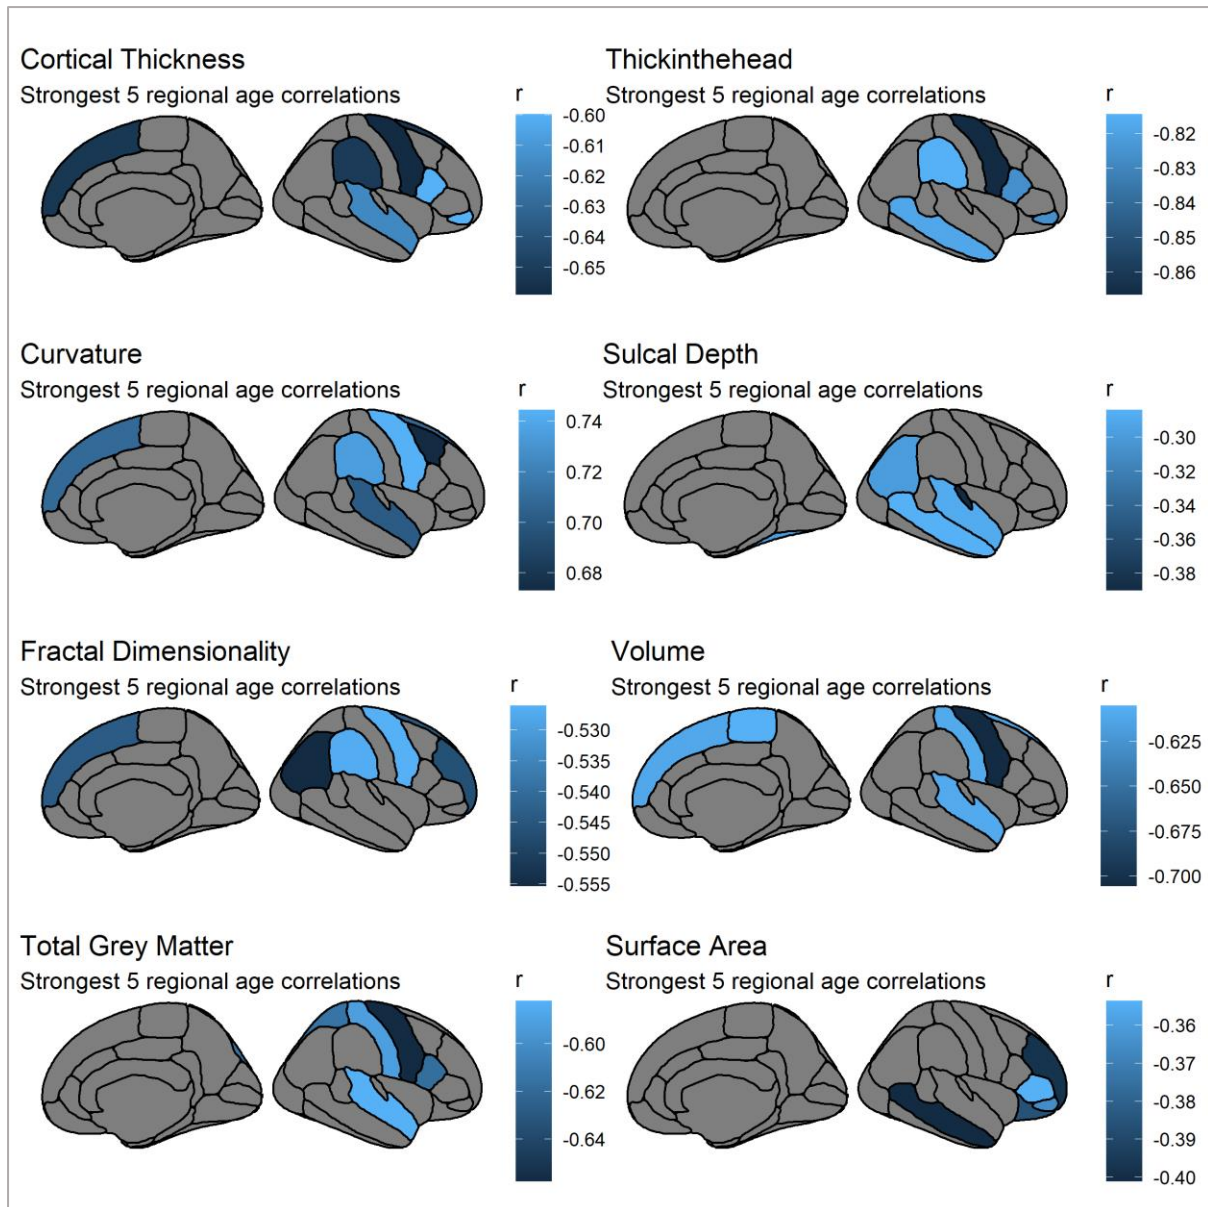

Figure 8: regions most strongly associated with age. Shows a large variability, with volume showing pre-frontal age effects while, for instance, sulcal depth effects are focused in the temporal lobes.

| ROI                        | Fractal Dim. |       | Curvature |       | Thickness |       | Thickinth head |       | Volume |       | TGM    |       | Depth  |       | Area   |       |
|----------------------------|--------------|-------|-----------|-------|-----------|-------|----------------|-------|--------|-------|--------|-------|--------|-------|--------|-------|
|                            | r            | p     | r         | p     | r         | p     | r              | p     | r      | p     | r      | p     | r      | p     | r      | p     |
| bankssts                   | NA           | NA    | NA        | NA    | NA        | NA    | -0.783         | <.001 | -0.496 | <.001 | NA     | NA    | NA     | NA    | NA     | NA    |
| caudal anterior cingulate  | -0.285       | <.001 | 0.589     | <.001 | -0.353    | <.001 | -0.649         | <.001 | -0.366 | <.001 | -0.443 | <.001 | 0.131  | 0.002 | -0.216 | <.001 |
| caudal middle frontal      | -0.479       | <.001 | 0.673     | <.001 | -0.569    | <.001 | -0.772         | <.001 | -0.501 | <.001 | -0.557 | <.001 | -0.118 | 0.005 | -0.233 | <.001 |
| corpus callosum            | -0.207       | <.001 | 0.451     | <.001 | -0.239    | <.001 | -0.609         | <.001 | -0.361 | <.001 | -0.536 | <.001 | -0.033 | 0.494 | -0.191 | <.001 |
| cuneus                     | -0.037       | 0.349 | -0.036    | 0.365 | -0.159    | <.001 | -0.357         | <.001 | 0.016  | 0.685 | -0.35  | <.001 | -0.008 | 0.894 | -0.009 | 0.843 |
| entorhinal                 | NA           | NA    | NA        | NA    | NA        | NA    | -0.313         | <.001 | -0.264 | <.001 | NA     | NA    | NA     | NA    | NA     | NA    |
| fusiform                   | -0.38        | <.001 | 0.492     | <.001 | -0.305    | <.001 | -0.683         | <.001 | -0.374 | <.001 | -0.461 | <.001 | -0.298 | <.001 | -0.306 | <.001 |
| inferior parietal          | -0.555       | <.001 | 0.671     | <.001 | -0.585    | <.001 | -0.747         | <.001 | -0.558 | <.001 | -0.524 | <.001 | -0.298 | <.001 | -0.347 | <.001 |
| inferior temporal          | -0.27        | <.001 | 0.475     | <.001 | -0.209    | <.001 | -0.646         | <.001 | -0.293 | <.001 | -0.431 | <.001 | -0.216 | <.001 | -0.268 | <.001 |
| insula                     | -0.242       | <.001 | 0.63      | <.001 | -0.536    | <.001 | -0.71          | <.001 | -0.423 | <.001 | -0.49  | <.001 | 0.018  | 0.769 | -0.004 | 0.929 |
| isthmus cingulate          | -0.352       | <.001 | 0.523     | <.001 | -0.423    | <.001 | -0.76          | <.001 | -0.405 | <.001 | -0.387 | <.001 | -0.048 | 0.303 | -0.165 | <.001 |
| lateral occipital          | -0.414       | <.001 | 0.519     | <.001 | -0.297    | <.001 | -0.647         | <.001 | -0.329 | <.001 | -0.467 | <.001 | -0.176 | <.001 | -0.254 | <.001 |
| lateral orbitofrontal      | -0.389       | <.001 | 0.396     | <.001 | -0.2      | <.001 | -0.627         | <.001 | -0.491 | <.001 | -0.502 | <.001 | -0.226 | <.001 | -0.386 | <.001 |
| lingual                    | -0.256       | <.001 | 0.506     | <.001 | -0.321    | <.001 | -0.65          | <.001 | -0.343 | <.001 | -0.567 | <.001 | -0.14  | 0.001 | -0.201 | <.001 |
| medial orbitofrontal       | -0.239       | <.001 | 0.335     | <.001 | -0.296    | <.001 | -0.55          | <.001 | -0.443 | <.001 | -0.541 | <.001 | -0.002 | 0.972 | -0.226 | <.001 |
| middle temporal            | -0.446       | <.001 | 0.637     | <.001 | -0.534    | <.001 | -0.818         | <.001 | -0.544 | <.001 | -0.513 | <.001 | -0.284 | <.001 | -0.401 | <.001 |
| paracentral                | -0.463       | <.001 | 0.459     | <.001 | -0.578    | <.001 | -0.663         | <.001 | -0.605 | <.001 | -0.564 | <.001 | -0.039 | 0.409 | -0.161 | <.001 |
| parahippocampal            | -0.116       | 0.003 | 0.226     | <.001 | -0.149    | <.001 | -0.45          | <.001 | -0.354 | <.001 | -0.433 | <.001 | -0.062 | 0.17  | -0.232 | <.001 |
| pars opercularis           | -0.487       | <.001 | 0.637     | <.001 | -0.6      | <.001 | -0.826         | <.001 | -0.597 | <.001 | -0.617 | <.001 | -0.063 | 0.17  | -0.333 | <.001 |
| pars orbitalis             | -0.397       | <.001 | 0.252     | <.001 | -0.6      | <.001 | -0.826         | <.001 | -0.459 | <.001 | -0.523 | <.001 | -0.077 | 0.085 | -0.365 | <.001 |
| pars triangularis          | -0.508       | <.001 | 0.564     | <.001 | -0.581    | <.001 | -0.797         | <.001 | -0.599 | <.001 | -0.525 | <.001 | -0.124 | 0.003 | -0.354 | <.001 |
| pericalcarine              | -0.118       | 0.003 | 0.487     | <.001 | -0.049    | 0.213 | -0.604         | <.001 | -0.389 | <.001 | -0.46  | <.001 | -0.015 | 0.775 | -0.055 | 0.178 |
| postcentral                | -0.469       | <.001 | 0.632     | <.001 | -0.494    | <.001 | -0.773         | <.001 | -0.609 | <.001 | -0.591 | <.001 | -0.218 | <.001 | -0.055 | 0.178 |
| posterior cingulate        | -0.45        | <.001 | 0.595     | <.001 | -0.459    | <.001 | -0.706         | <.001 | -0.529 | <.001 | -0.522 | <.001 | 0.169  | <.001 | -0.341 | <.001 |
| precentral                 | -0.526       | <.001 | 0.744     | <.001 | -0.659    | <.001 | -0.867         | <.001 | -0.706 | <.001 | -0.658 | <.001 | -0.105 | 0.014 | -0.205 | <.001 |
| precuneus                  | -0.487       | <.001 | 0.663     | <.001 | -0.559    | <.001 | -0.731         | <.001 | -0.526 | <.001 | -0.408 | <.001 | 0.052  | 0.259 | -0.266 | <.001 |
| rostral anterior cingulate | -0.316       | <.001 | 0.379     | <.001 | -0.248    | <.001 | -0.597         | <.001 | -0.36  | <.001 | -0.53  | <.001 | -0.017 | 0.769 | -0.227 | <.001 |
| rostral middle frontal     | -0.546       | <.001 | 0.597     | <.001 | -0.512    | <.001 | -0.674         | <.001 | -0.583 | <.001 | -0.56  | <.001 | -0.265 | <.001 | -0.398 | <.001 |
| superior frontal           | -0.544       | <.001 | 0.709     | <.001 | -0.653    | <.001 | -0.759         | <.001 | -0.611 | <.001 | -0.523 | <.001 | 0.001  | 0.972 | -0.313 | <.001 |
| superior parietal          | -0.514       | <.001 | 0.595     | <.001 | -0.491    | <.001 | -0.62          | <.001 | -0.562 | <.001 | -0.614 | <.001 | -0.071 | 0.114 | -0.298 | <.001 |
| superior temporal          | -0.446       | <.001 | 0.701     | <.001 | -0.616    | <.001 | -0.62          | <.001 | -0.609 | <.001 | -0.582 | <.001 | -0.288 | <.001 | -0.332 | <.001 |
| supramarginal              | -0.527       | <.001 | 0.735     | <.001 | -0.651    | <.001 | -0.814         | <.001 | -0.532 | <.001 | -0.529 | <.001 | -0.131 | 0.002 | -0.266 | <.001 |
| temporal pole              | NA           | NA    | NA        | NA    | NA        | NA    | -0.469         | <.001 | -0.065 | 0.1   | NA     | NA    | NA     | NA    | NA     | NA    |
| transverse temporal        | -0.441       | <.001 | 0.554     | <.001 | -0.403    | <.001 | -0.772         | <.001 | -0.523 | <.001 | -0.555 | <.001 | -0.39  | <.001 | -0.251 | <.001 |

Table 5: Regional age correlations in Cam-CAN. All p-values are FDR corrected at alpha = 0.05.

| ROI                        | Fractal Dim. |        | Curvature |       | Thickness |        | Thickinththead |       | Volume |        | TGM    |       | Depth   |        | Area   |        |
|----------------------------|--------------|--------|-----------|-------|-----------|--------|----------------|-------|--------|--------|--------|-------|---------|--------|--------|--------|
|                            | r            | p      | r         | p     | r         | p      | r              | p     | r      | p      | r      | p     | r       | p      | r      | p      |
| bankssts                   | NA           | NA     | NA        | NA    | NA        | NA     | 0.5674         | <.001 | 0.444  | o      | NA     | NA    | NA      | NA     | NA     | NA     |
| caudal anterior cingulate  | 0.2698       | <.001  | -0.417    | <.001 | 0.1704    | <.001  | 0.4147         | <.001 | 0.3295 | <.001  | 0.4097 | <.001 | -0.0778 | 0.0635 | 0.2379 | <.001  |
| caudal middle frontal      | 0.3771       | <.001  | -0.471    | <.001 | 0.4006    | <.001  | 0.5299         | <.001 | 0.4446 | <.001  | 0.4864 | <.001 | 0.1249  | 0.0033 | 0.2622 | <.001  |
| corpus callosum            | 0.215        | <.001  | -0.2576   | <.001 | 0.1928    | <.001  | 0.3885         | <.001 | 0.346  | <.001  | 0.4828 | <.001 | 0.0748  | 0.072  | 0.2375 | <.001  |
| cuneus                     | 0.1092       | 0.0064 | -0.0358   | 0.371 | 0.1683    | <.001  | 0.3039         | <.001 | 0.0715 | 0.0733 | 0.3672 | <.001 | 0.0789  | 0.0622 | 0.0963 | 0.0158 |
| entorhinal                 | NA           | NA     | NA        | NA    | NA        | NA     | 0.193          | <.001 | 0.2084 | <.001  | NA     | NA    | NA      | NA     | NA     | NA     |
| fusiform                   | 0.3402       | <.001  | -0.3918   | <.001 | 0.228     | o      | 0.492          | <.001 | 0.3851 | <.001  | 0.4307 | <.001 | 0.2932  | <.001  | 0.3356 | <.001  |
| inferior parietal          | 0.4256       | <.001  | -0.4731   | <.001 | 0.4092    | o      | 0.5132         | <.001 | 0.4706 | <.001  | 0.46   | <.001 | 0.2483  | <.001  | 0.3238 | <.001  |
| inferior temporal          | 0.2339       | <.001  | -0.3343   | <.001 | 0.1356    | <.001  | 0.4609         | <.001 | 0.3132 | <.001  | 0.4296 | <.001 | 0.2008  | <.001  | 0.2904 | <.001  |
| insula                     | 0.2481       | <.001  | -0.4877   | <.001 | 0.4297    | o      | 0.5285         | <.001 | 0.4425 | <.001  | 0.4822 | <.001 | 0.0743  | 0.072  | 0.1121 | 0.0051 |
| isthmus cingulate          | 0.3602       | <.001  | -0.3941   | <.001 | 0.2673    | o      | 0.5197         | <.001 | 0.4097 | <.001  | 0.4044 | <.001 | 0.0888  | 0.0367 | 0.2608 | <.001  |
| lateral occipital          | 0.3459       | <.001  | -0.3806   | <.001 | 0.2138    | o      | 0.4512         | <.001 | 0.333  | <.001  | 0.4508 | <.001 | 0.1978  | <.001  | 0.2771 | <.001  |
| lateral orbitofrontal      | 0.3265       | <.001  | -0.3219   | <.001 | 0.1324    | 0.001  | 0.4521         | <.001 | 0.4797 | <.001  | 0.4834 | <.001 | 0.1785  | <.001  | 0.4013 | <.001  |
| lingual                    | 0.2588       | <.001  | -0.395    | <.001 | 0.2754    | o      | 0.4362         | <.001 | 0.3567 | <.001  | 0.5064 | <.001 | 0.1386  | 0.0012 | 0.2481 | <.001  |
| medial orbitofrontal       | 0.2589       | <.001  | -0.2022   | <.001 | 0.206     | o      | 0.3608         | <.001 | 0.409  | <.001  | 0.4988 | <.001 | 0.1313  | 0.0022 | 0.2646 | <.001  |
| middle temporal            | 0.3497       | <.001  | -0.4748   | <.001 | 0.3663    | o      | 0.5803         | <.001 | 0.474  | <.001  | 0.4836 | <.001 | 0.2195  | <.001  | 0.3872 | <.001  |
| paracentral                | 0.3923       | <.001  | -0.3062   | <.001 | 0.4319    | o      | 0.4234         | <.001 | 0.5066 | <.001  | 0.4851 | <.001 | 0.0934  | 0.0298 | 0.2189 | <.001  |
| parahippocampal            | 0.0971       | 0.015  | -0.2133   | <.001 | 0.0967    | 0.0158 | 0.3032         | <.001 | 0.3136 | <.001  | 0.4221 | <.001 | 0.096   | 0.0262 | 0.2378 | <.001  |
| pars opercularis           | 0.3566       | <.001  | -0.4324   | <.001 | 0.4052    | o      | 0.5762         | <.001 | 0.4932 | <.001  | 0.5221 | <.001 | 0.1024  | 0.0176 | 0.3045 | <.001  |
| pars orbitalis             | 0.3343       | <.001  | -0.1666   | <.001 | 0.4052    | o      | 0.5762         | <.001 | 0.4301 | <.001  | 0.4901 | <.001 | 0.0484  | 0.2331 | 0.3523 | <.001  |
| pars triangularis          | 0.4014       | <.001  | -0.4317   | <.001 | 0.3947    | <.001  | 0.5717         | <.001 | 0.5055 | <.001  | 0.5126 | <.001 | 0.1776  | <.001  | 0.3417 | <.001  |
| pericalcarine              | 0.1584       | <.001  | -0.3028   | <.001 | 0.0817    | 0.0407 | 0.3864         | <.001 | 0.3562 | <.001  | 0.4512 | <.001 | 0.1093  | 0.0111 | 0.1201 | 0.0027 |
| postcentral                | 0.3729       | <.001  | -0.3886   | <.001 | 0.3695    | <.001  | 0.54           | <.001 | 0.5282 | <.001  | 0.5172 | <.001 | 0.2284  | <.001  | 0.1201 | 0.0027 |
| posterior cingulate        | 0.3972       | <.001  | -0.4792   | <.001 | 0.27      | <.001  | 0.4584         | <.001 | 0.484  | <.001  | 0.4692 | <.001 | -0.0528 | 0.1995 | 0.3768 | <.001  |
| precentral                 | 0.4311       | <.001  | -0.5043   | <.001 | 0.5033    | <.001  | 0.6068         | <.001 | 0.5988 | <.001  | 0.5486 | <.001 | 0.1299  | 0.0023 | 0.2782 | <.001  |
| precuneus                  | 0.4034       | <.001  | -0.4873   | <.001 | 0.4185    | <.001  | 0.4999         | <.001 | 0.4739 | <.001  | 0.3961 | <.001 | 0.0232  | 0.5615 | 0.296  | <.001  |
| rostral anterior cingulate | 0.2956       | <.001  | -0.3167   | <.001 | 0.1279    | 0.0014 | 0.4072         | <.001 | 0.3444 | <.001  | 0.5039 | <.001 | 0.0574  | 0.1668 | 0.2567 | <.001  |
| rostral middle frontal     | 0.4321       | <.001  | -0.4144   | <.001 | 0.333     | <.001  | 0.4428         | <.001 | 0.5018 | <.001  | 0.5364 | <.001 | 0.249   | <.001  | 0.3703 | <.001  |
| superior frontal           | 0.4081       | <.001  | -0.4722   | <.001 | 0.4384    | <.001  | 0.5096         | <.001 | 0.5343 | <.001  | 0.4952 | <.001 | 0.0893  | 0.0367 | 0.343  | <.001  |
| superior parietal          | 0.392        | <.001  | -0.4086   | <.001 | 0.3547    | <.001  | 0.4109         | <.001 | 0.4642 | <.001  | 0.5267 | <.001 | 0.084   | 0.0477 | 0.2766 | <.001  |
| superior temporal          | 0.3721       | <.001  | -0.5254   | <.001 | 0.4633    | <.001  | 0.4109         | <.001 | 0.5332 | <.001  | 0.5393 | <.001 | 0.2944  | <.001  | 0.3448 | <.001  |
| supramarginal              | 0.4267       | <.001  | -0.5117   | <.001 | 0.4574    | <.001  | 0.5694         | <.001 | 0.4669 | <.001  | 0.4851 | <.001 | 0.2104  | <.001  | 0.2766 | <.001  |
| temporal pole              | NA           | NA     | NA        | NA    | NA        | NA     | 0.3933         | <.001 | 0.1189 | 0.0029 | NA     | NA    | NA      | NA     | NA     | NA     |
| transverse temporal        | 0.4103       | <.001  | -0.4615   | <.001 | 0.3054    | <.001  | 0.5635         | <.001 | 0.4785 | <.001  | 0.5139 | <.001 | 0.3651  | <.001  | 0.283  | <.001  |

Table 6: Regional fluid intelligence correlations in Cam-CAN. All p-values are FDR corrected at alpha = 0.05.

| ROI                               | Fractal Dim. |        | Curvature |        | Thickness |        | Thickinthhe<br>ad |        | Volume |        | TGM    |        | Depth  |        | Area   |        |
|-----------------------------------|--------------|--------|-----------|--------|-----------|--------|-------------------|--------|--------|--------|--------|--------|--------|--------|--------|--------|
|                                   | r            | p      | r         | p      | r         | p      | r                 | p      | r      | p      | r      | p      | r      | p      | r      | p      |
| <b>bankssts</b>                   | NA           | NA     | NA        | NA     | NA        | NA     | 0.0464            | 0.7974 | 0.1451 | <0.05  | NA     | NA     | NA     | NA     | NA     | NA     |
| <b>caudal anterior cingulate</b>  | 0.1172       | 0.0071 | -0.0261   | 0.8393 | -0.0568   | 0.5147 | 0.0107            | 0.8935 | 0.1166 | 0.0039 | 0.1592 | <0.05  | 0.0295 | 0.4757 | 0.1229 | 0.0024 |
| <b>caudal middle frontal</b>      | 0.1048       | 0.0123 | -0.0134   | 0.9842 | 0.0432    | 0.602  | 0.0303            | 0.8031 | 0.1667 | <0.05  | 0.1471 | <0.05  | 0.0924 | 0.0374 | 0.1657 | <0.05  |
| <b>corpus callosum</b>            | 0.1153       | 0.0071 | 0.0681    | 0.3866 | 0.0553    | 0.5147 | 0.0031            | 0.9507 | 0.1504 | <0.05  | 0.1203 | <0.05  | 0.0568 | 0.1715 | 0.1548 | <0.05  |
| <b>cuneus</b>                     | 0.094        | 0.0249 | -0.0273   | 0.8393 | 0.039     | 0.602  | 0.0725            | 0.6909 | 0.0858 | 0.0316 | 0.1504 | <0.05  | 0.0866 | 0.0491 | 0.1114 | 0.0056 |
| <b>entorhinal</b>                 | NA           | NA     | NA        | NA     | NA        | NA     | -0.0025           | 0.9507 | 0.1114 | 0.0057 | NA     | NA     | NA     | NA     | NA     | NA     |
| <b>fusiform</b>                   | 0.1311       | 0.004  | -0.0691   | 0.3866 | 0.029     | 0.6909 | 0.0312            | 0.8031 | 0.19   | <0.05  | 0.1711 | <0.05  | 0.103  | 0.0222 | 0.1878 | 0      |
| <b>inferior parietal</b>          | 0.0929       | 0.0253 | -0.0094   | 0.9842 | 0.0337    | 0.6181 | 0.0219            | 0.8935 | 0.143  | <0.05  | 0.1683 | <0.05  | 0.0739 | 0.0902 | 0.1392 | <0.05  |
| <b>inferior temporal</b>          | 0.0773       | 0.0568 | -0.0068   | 0.9842 | 0.0207    | 0.7455 | 0.0467            | 0.7974 | 0.1625 | <0.05  | 0.1638 | <0.05  | 0.1029 | 0.0222 | 0.1504 | <0.05  |
| <b>insula</b>                     | 0.1365       | 0.0032 | -0.0634   | 0.3866 | 0.1065    | 0.2351 | 0.0814            | 0.6909 | 0.2199 | <0.05  | 0.195  | <0.05  | 0.1255 | 0.0052 | 0.1579 | <0.05  |
| <b>isthmus cingulate</b>          | 0.1782       | <0.05  | -0.0477   | 0.4806 | 0.0139    | 0.7787 | 0.0256            | 0.8881 | 0.1898 | <0.05  | 0.1937 | <0.05  | 0.0629 | 0.1434 | 0.1956 | 0      |
| <b>lateral occipital</b>          | 0.1047       | 0.0123 | -0.0067   | 0.9842 | 0.0195    | 0.7455 | 0.0229            | 0.8935 | 0.1566 | <0.05  | 0.1941 | <0.05  | 0.1244 | 0.0052 | 0.1569 | <0.05  |
| <b>lateral orbitofrontal</b>      | 0.1215       | 0.0071 | -0.0813   | 0.3866 | 0.0415    | 0.602  | 0.0654            | 0.6909 | 0.2129 | <0.05  | 0.219  | <0.05  | 0.0613 | 0.1434 | 0.1971 | 0      |
| <b>lingual</b>                    | 0.1367       | 0.0032 | -0.0562   | 0.4117 | 0.0921    | 0.325  | 0.0316            | 0.8031 | 0.1713 | <0.05  | 0.1418 | <0.05  | 0.0447 | 0.2813 | 0.1506 | <0.05  |
| <b>medial orbitofrontal</b>       | 0.1477       | 0.0021 | 0.0305    | 0.8121 | 0.0341    | 0.6181 | 0.0113            | 0.8935 | 0.1634 | <0.05  | 0.1834 | <0.05  | 0.1904 | 0      | 0.1619 | <0.05  |
| <b>middle temporal</b>            | 0.0895       | 0.0298 | -0.0535   | 0.4307 | 0.0377    | 0.602  | 0.0494            | 0.7974 | 0.1596 | <0.05  | 0.158  | <0.05  | 0.062  | 0.1434 | 0.1697 | <0.05  |
| <b>paracentral</b>                | 0.1171       | 0.0071 | -0.0154   | 0.9842 | 0.06      | 0.5147 | 0.009             | 0.9025 | 0.1445 | <0.05  | 0.1381 | <0.05  | 0.1009 | 0.0222 | 0.1484 | <0.05  |
| <b>parahippocampal</b>            | 0.0472       | 0.2376 | -0.0684   | 0.3866 | 0.0156    | 0.7727 | 0.0037            | 0.9507 | 0.1075 | 0.0075 | 0.1613 | <0.05  | 0.0626 | 0.1434 | 0.1099 | 0.006  |
| <b>pars opercularis</b>           | 0.0729       | 0.0702 | <0.05     | 0.9842 | 0.0231    | 0.7455 | 0.0372            | 0.7974 | 0.1335 | 0.001  | 0.1245 | 0.002  | 0.1008 | 0.0222 | 0.1258 | 0.002  |
| <b>pars orbitalis</b>             | 0.1144       | 0.0071 | 0.003     | 0.9842 | 0.0231    | 0.7455 | 0.0372            | 0.7974 | 0.1926 | <0.05  | 0.2176 | <0.05  | 0.0241 | 0.5474 | 0.1737 | 0      |
| <b>pars triangularis</b>          | 0.1166       | 0.0071 | -0.0571   | 0.4117 | 0.0374    | 0.602  | 0.056             | 0.7974 | 0.1519 | <0.05  | 0.2034 | <0.05  | 0.1347 | 0.0037 | 0.1539 | <0.05  |
| <b>pericalcarine</b>              | 0.1115       | 0.0081 | 0.0694    | 0.3866 | 0.0607    | 0.5147 | -0.0171           | 0.8935 | 0.1275 | 0.0017 | 0.166  | <0.05  | 0.1321 | 0.004  | 0.1113 | 0.0056 |
| <b>postcentral</b>                | 0.0824       | 0.0451 | 0.0496    | 0.476  | 0.0492    | 0.602  | 0.0415            | 0.7974 | 0.1488 | <0.05  | 0.138  | <0.05  | 0.1241 | 0.0052 | 0.1113 | 0.0056 |
| <b>posterior cingulate</b>        | 0.1405       | 0.0032 | -0.1061   | 0.2342 | -0.0092   | 0.8456 | 0.0173            | 0.8935 | 0.1852 | <0.05  | 0.1733 | <0.05  | 0.0898 | 0.0419 | 0.202  | 0      |
| <b>precentral</b>                 | 0.1151       | 0.0071 | -0.0146   | 0.9842 | 0.0778    | 0.3985 | 0.0532            | 0.7974 | 0.1731 | <0.05  | 0.1482 | <0.05  | 0.1022 | 0.0222 | 0.1955 | 0      |
| <b>precuneus</b>                  | 0.116        | 0.0071 | -0.0423   | 0.5621 | 0.0687    | 0.5147 | 0.0315            | 0.8031 | 0.1649 | <0.05  | 0.1831 | <0.05  | 0.0791 | 0.0736 | 0.1589 | <0.05  |
| <b>rostral anterior cingulate</b> | 0.1306       | 0.004  | -0.0643   | 0.3866 | 0.0155    | 0.7727 | 0.0429            | 0.7974 | 0.1442 | <0.05  | 0.1765 | <0.05  | 0.0709 | 0.102  | 0.1286 | 0.0016 |
| <b>rostral middle frontal</b>     | 0.1155       | 0.0071 | -0.0024   | 0.9842 | 0.0019    | 0.9625 | 0.0126            | 0.8935 | 0.1746 | <0.05  | 0.2204 | <0.05  | 0.1347 | 0.0037 | 0.1671 | <0.05  |
| <b>superior frontal</b>           | 0.0926       | 0.0253 | 0.0068    | 0.9842 | 0.0197    | 0.7455 | 0.0198            | 0.8935 | 0.1833 | <0.05  | 0.2126 | <0.05  | 0.1392 | 0.0036 | 0.1958 | 0      |
| <b>superior parietal</b>          | 0.0794       | 0.052  | -0.0048   | 0.9842 | 0.0433    | 0.602  | 0.0114            | 0.8935 | 0.1177 | 0.0037 | 0.117  | 0.0035 | 0.074  | 0.0902 | 0.1054 | 0.0082 |
| <b>superior temporal</b>          | 0.1117       | 0.0081 | -0.059    | 0.4117 | 0.0787    | 0.3985 | 0.0114            | 0.8935 | 0.1808 | <0.05  | 0.1569 | <0.05  | 0.1452 | 0.0027 | 0.1891 | 0      |
| <b>supramarginal</b>              | 0.117        | 0.0071 | -0.0045   | 0.9842 | 0.0453    | 0.602  | 0.0408            | 0.7974 | 0.1592 | <0.05  | 0.1725 | <0.05  | 0.1519 | 0.0021 | 0.1475 | <0.05  |
| <b>temporal pole</b>              | NA           | NA     | NA        | NA     | NA        | NA     | 0.0795            | 0.6909 | 0.0942 | 0.0188 | NA     | NA     | NA     | NA     | NA     | NA     |
| <b>transverse temporal</b>        | 0.1582       | 0.0011 | -         | 0.2342 | 0.0612    | 0.5147 | 0.0695            | 0.6909 | 0.1677 | <0.05  | 0.1158 | 0.0037 | 0.1282 | 0.005  | 0.1478 | <0.05  |

Table 7: Regional age-residualized fluid intelligence correlations in Cam-CAN. All p-values are FDR corrected at alpha = 0.05.



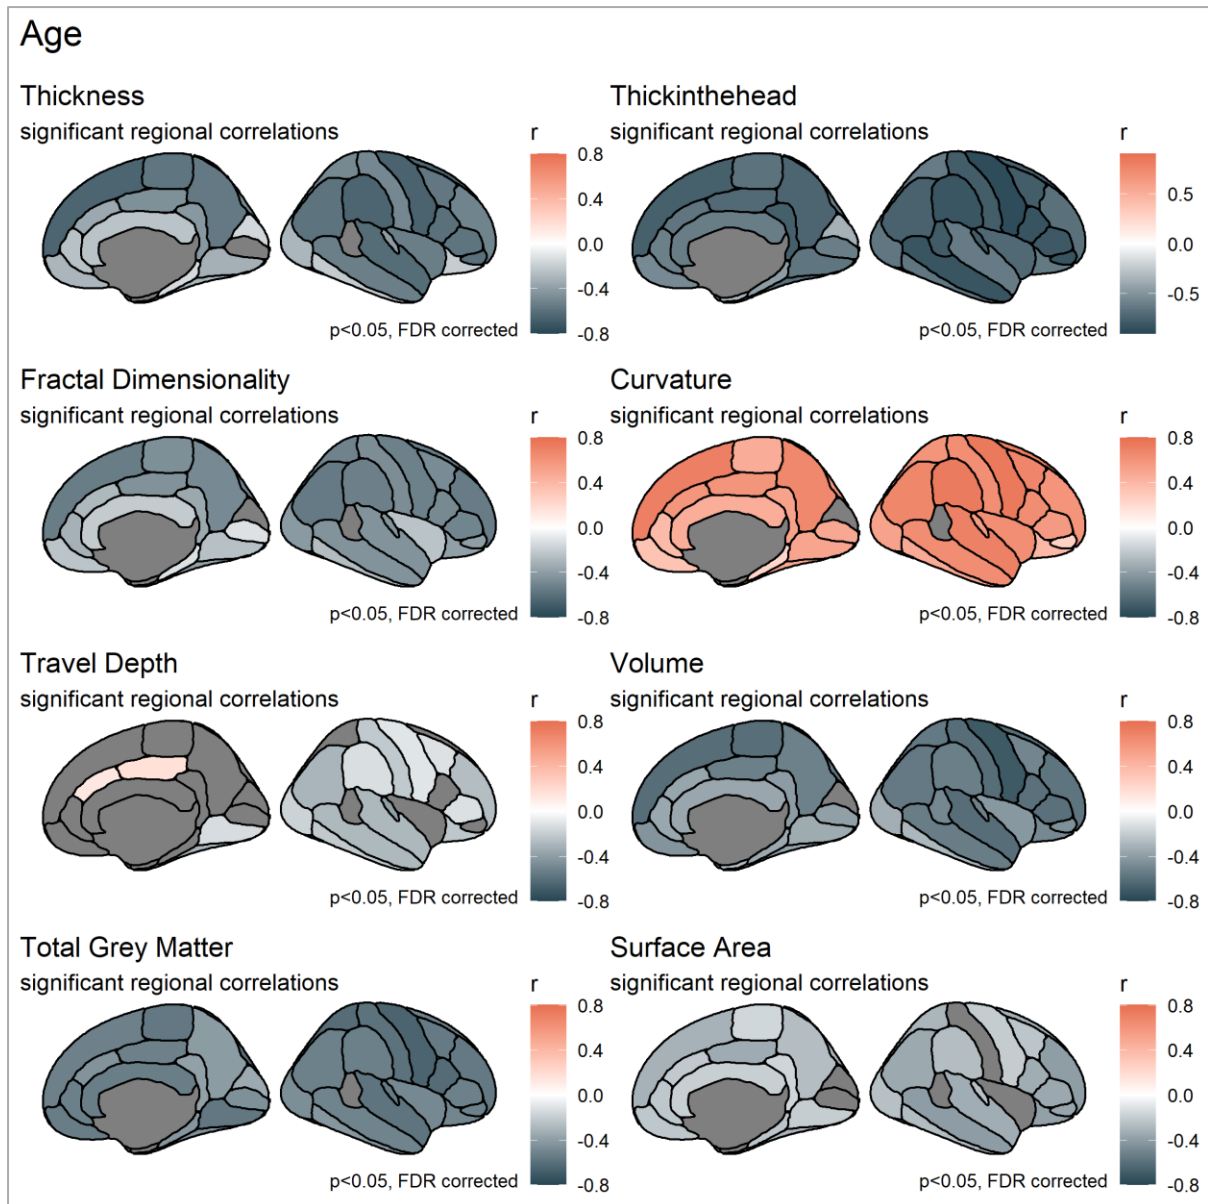

Figure 9: Significant regional age correlation for each metric. FDR corrected at  $\alpha = 0.05$ .

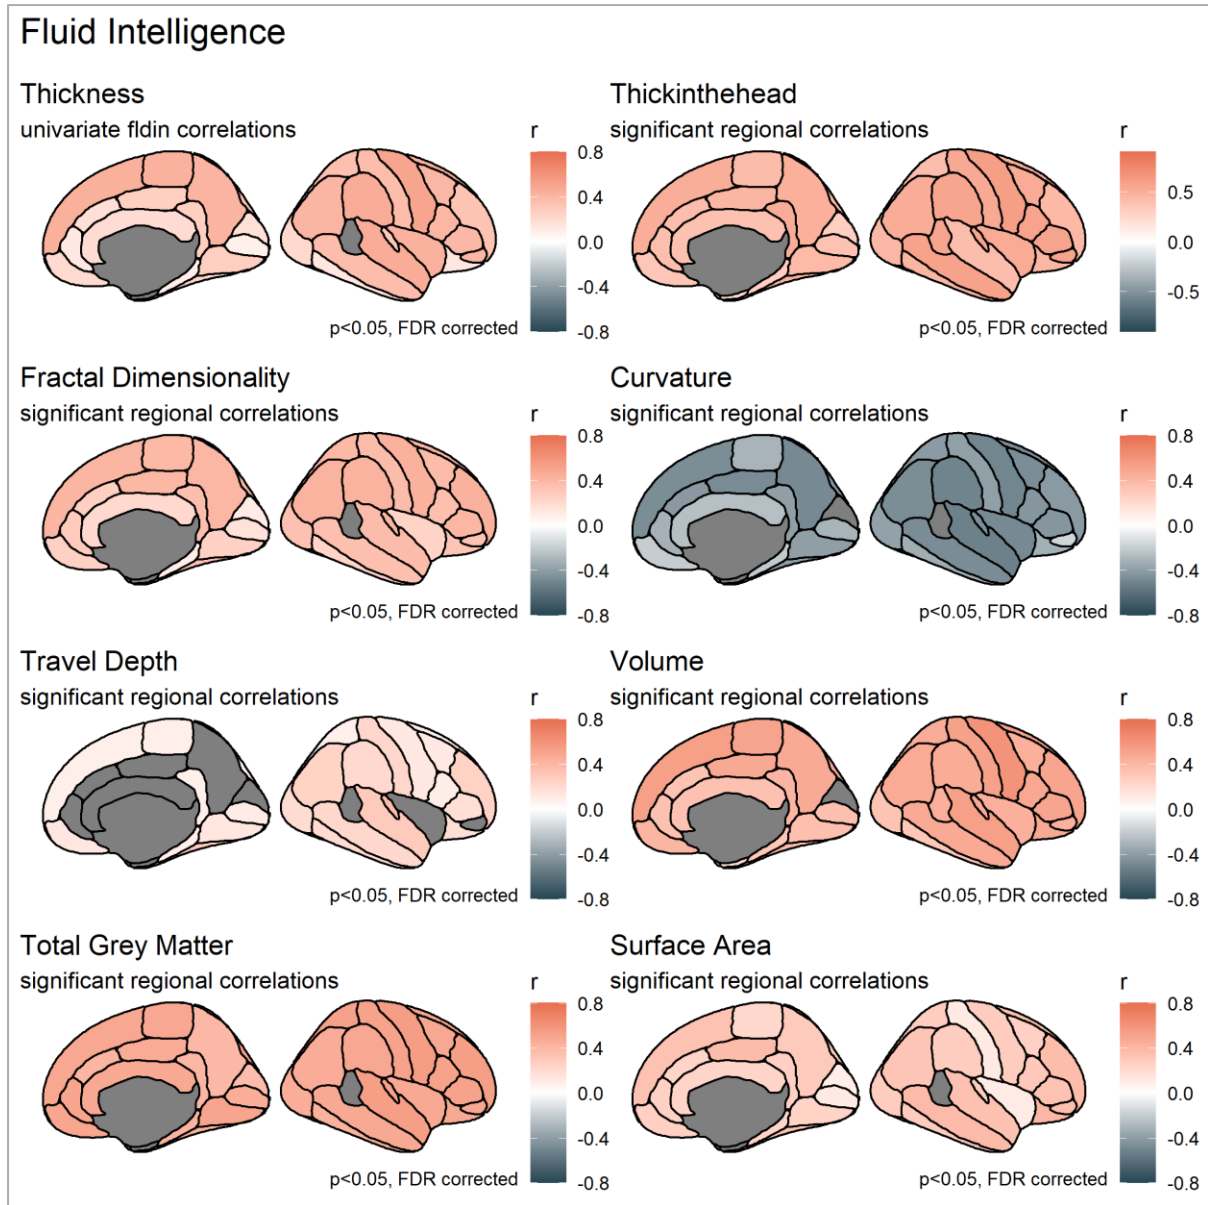

Figure 10: Significant regional fluid intelligence correlation for each metric. FDR corrected at  $\alpha = 0.05$ .



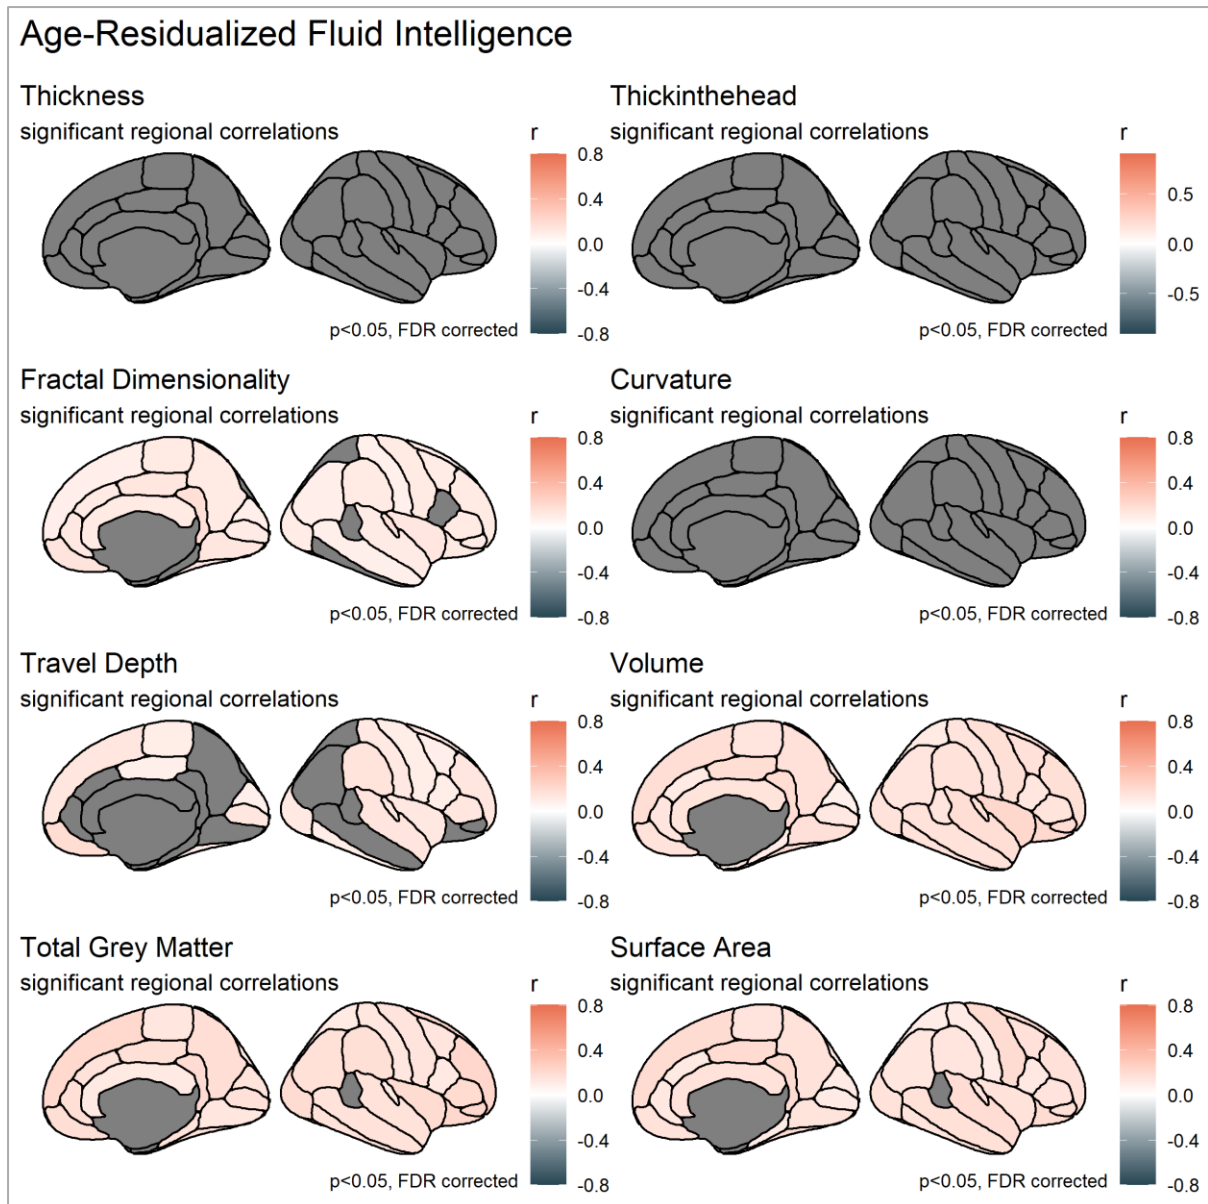

Figure 11: Significant regional age-residualized fluid intelligence correlation for each metric. FDR corrected at  $\alpha = 0.05$ .

## 6 Longitudinal results

First, to assess whether Cattell test type (online versus pen/paper) made a difference, we tested for metric invariance and scalar invariance in the wave two cognitive data. This led to negligible drops in model fit ( $\Delta\text{CFI} = 0.008$  and  $0.004$  for metric and scalar invariance, respectively, Cheung & Rensvold, 2002), suggesting that assuming pencil and paper vs computer-based testing had equal measurement properties did not adversely affect the measurement of fluid intelligence. For all further analysis, this grouping factor was therefore ignored. Second, to ensure comparability of cognitive scores across Time 1 and Time 2, we tested for longitudinal measurement invariance (Widaman, Ferrer & Conger, 2010). We found that imposing invariance did not meaningfully decrease model fit ( $\Delta\text{CFI} = 0.002$ ; Cheung & Rensvold, 2002), suggesting longitudinal measurement invariance is tenable, and we were able to proceed to interpret change scores in the latent factor. Following the above inspections, we used Latent Change Score Models (LCSM) to examine morphometric and cognitive change over time.

|                            | Time | <i>N</i> | Mean    | Minimum | Maximum | <i>SD</i> | Skewness | Excess kurtosis |
|----------------------------|------|----------|---------|---------|---------|-----------|----------|-----------------|
| <b>Age</b>                 | T1   | 261      | 54.97   | 19.25   | 89      | 18.17     | -0.02    | -1.16           |
|                            | T2   | 261      | 56.32   | 21.25   | 91.58   | 18.2      | -0.03    | -1.18           |
| <b>Cattell (sum score)</b> | T1   | 215      | 32.50   | 12      | 44      | 6.06      | -0.39    | -0.10           |
|                            | T2   | 215      | 30.42   | 10      | 44      | 6.65      | -0.76    | 0.80            |
| <b>Surface Area</b>        | T1   | 261      | 2527.43 | 1896.25 | 3299.01 | 256.81    | 0.22     | -0.22           |
|                            | T2   | 261      | 2521.75 | 1898.46 | 3297.51 | 255.73    | 0.23     | -0.21           |
| <b>Cortical Thickness</b>  | T1   | 261      | 2.61    | 2.28    | 2.89    | 0.1       | -0.19    | 0.45            |
|                            | T2   | 261      | 2.6     | 2.29    | 2.91    | 0.1       | -0.19    | 0.3             |
| <b>Volume</b>              | T1   | 261      | 7175.41 | 5417.15 | 9412.12 | 822.25    | 0.44     | -0.05           |
|                            | T2   | 261      | 7124.88 | 5342.85 | 9311.37 | 824.73    | 0.42     | -0.05           |

Table 8: Cam-CAN raw scores and descriptive statistics for age, Cattell and longitudinal brain structure metrics

| Cam-CAN          |             | Model Fit Indices |          |                      |       |       |                             |
|------------------|-------------|-------------------|----------|----------------------|-------|-------|-----------------------------|
| Metric           | Model       | $\chi^2$          | <i>p</i> | RMSEA [90 % CI]      | CFI   | SRMR  | Yuan-Bentler scaling factor |
| <b>Thickness</b> | <b>FIML</b> | 5.275             | 0.072    | 0.039 [0.000, 0.072] | 0.992 | 0.026 | 0.763                       |

|                     |             |       |       |                       |       |       |       |
|---------------------|-------------|-------|-------|-----------------------|-------|-------|-------|
| <b>Surface Area</b> | <b>FIML</b> | 4.228 | 0.121 | 0.033, [0.000, 0.079] | 0.997 | 0.015 | 0.721 |
| <b>Volume</b>       | <b>FIML</b> | 3.655 | 0.161 | 0.028 [0.000, 0.065]  | 0.995 | 0.014 | 1.468 |

Table 9: Second order latent change score model fit indices Cam-CAN.

### Model Fit Indices

| Metric              | $\chi^2$ | <i>p</i> | RMSEA [90 % CI]       | CFI   | SRMR  | Yuan-Bentler scaling factor |
|---------------------|----------|----------|-----------------------|-------|-------|-----------------------------|
| <b>Thickness</b>    | 13.605   | 0.001    | 0.090 [0.050, 0.135]  | 0.993 | 0.038 | 1.070                       |
| <b>Surface Area</b> | 2.418    | 0.298    | 0.033, [0.000, 0.079] | 0.999 | 0.007 | 1.091                       |
| <b>Volume</b>       | 47.648   | 0.000    | 0.178 [0.133, 0.227]  | 0.975 | 0.034 | 0.845                       |

Table 10: Second order latent change score model fit indices LCBC.

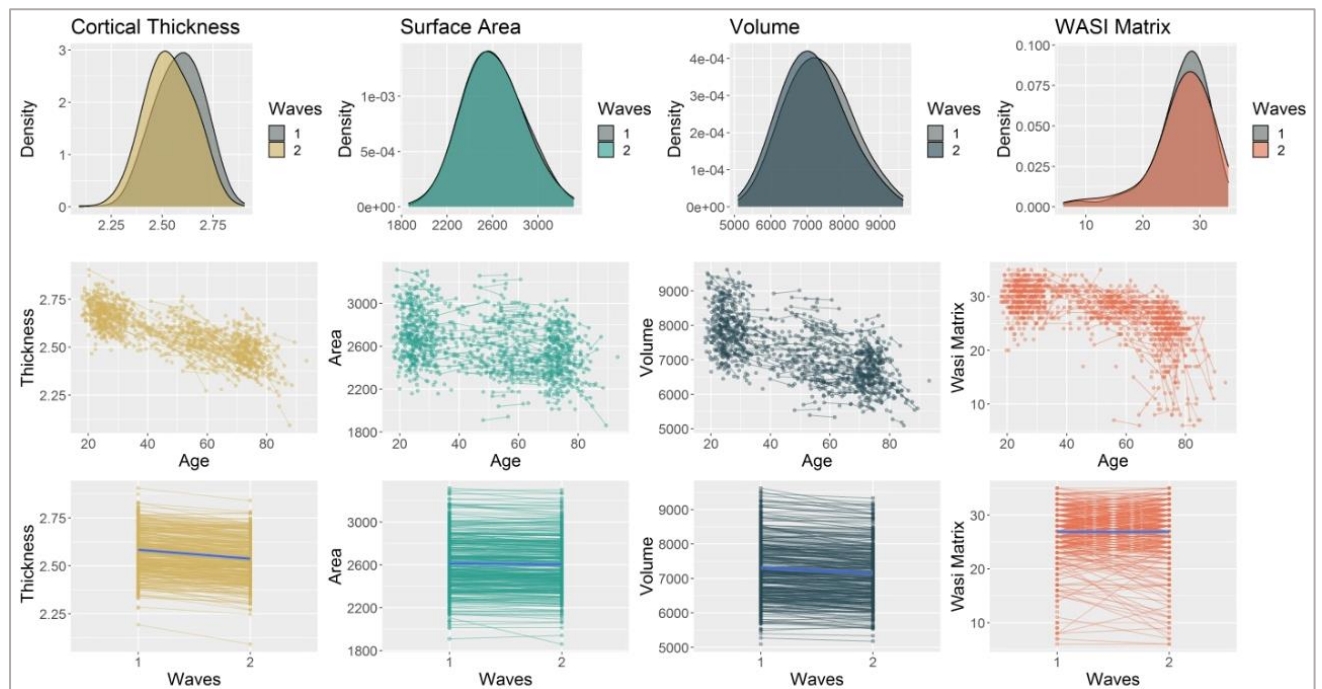

Figure 12: changes in volume, cortical thickness, surface area and fluid intelligence between time point 1 and time point 2 in LCBC sample.

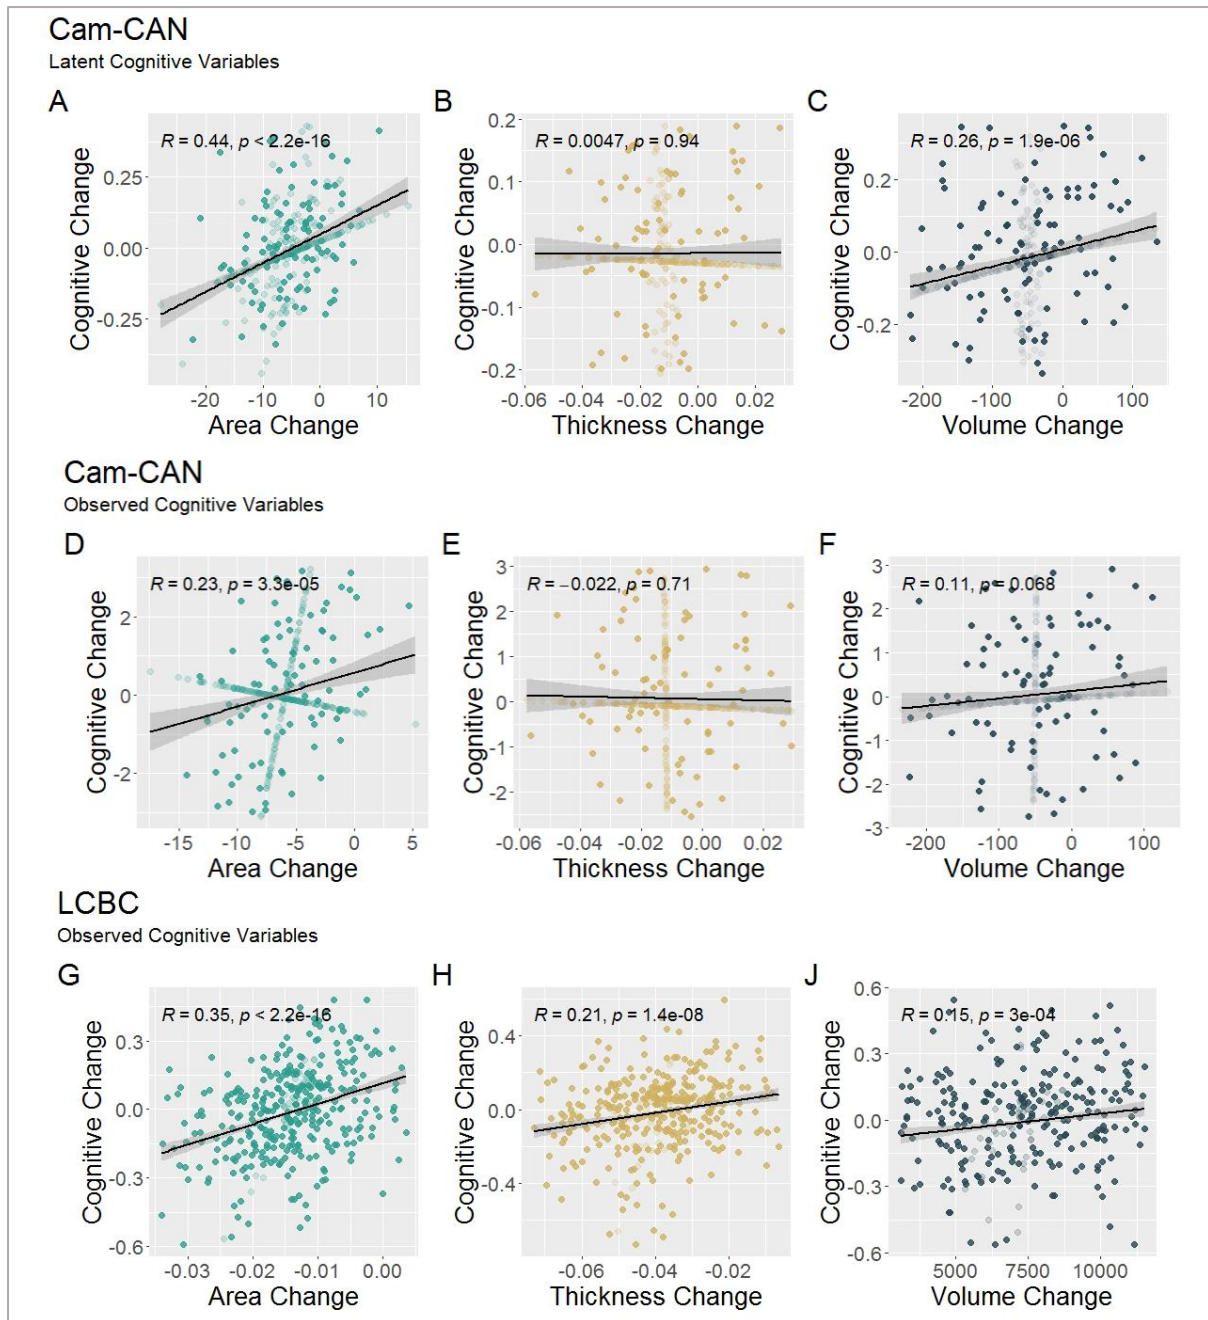

Figure 13: correlations of cognitive change and neural change in Cam-CAN (A-F) and LCBC (G-I). Shows that change in surface area is most strongly associated with cognitive change. Models A-C include latent cognitive variables, which were not possible to derive from the LCBC data, where we used observed cognitive scores instead. To compare like-for-like models, we include Cam-CAN observed variable models here, too (D-F). Note that the shaded dots are the models' missingness estimates.

# Power Analyses, Morphometric Double Dissociation

*Sophia Borgeest*

*23/09/2021*

## Intro

Here we use R's pwr package to run power analyses on the brain-age and brain-cognition relationship for volume, thickness and surface area. These include estimated correlation coefficients, based on well-powered findings in the literature.

## Age

First, let's run power analyses based on whole brain-age effect sizes (correlation coefficients) found in the literature. We use this well-powered study as a source of reference (see Table 1 for whole brain - age correlation coefficients):

[https://www.sciencedirect.com/science/article/pii/S0197458010003210?casa\\_token=IUY7YAgJKZsAAAAA:FCrWz1X7EWi5lKjsFmzGBYMzKnVknQ8\\_X2iBU3xqqdd-R3wU1pPnHEOasgn0XUZ175R4JtpXdvV](https://www.sciencedirect.com/science/article/pii/S0197458010003210?casa_token=IUY7YAgJKZsAAAAA:FCrWz1X7EWi5lKjsFmzGBYMzKnVknQ8_X2iBU3xqqdd-R3wU1pPnHEOasgn0XUZ175R4JtpXdvV)

As a reminder, CamCAN has a sample size of  $N = 647$ , LCBC has  $N = 1345$ .

```
# Volume - age
pwr.r.test(n = NULL, r = -0.34, sig.level = 0.01 , power = 0.80)
```

```
##
##      approximate correlation power calculation (arctangh transformation)
##
##           n = 95.65769
##           r = 0.34
##      sig.level = 0.01
##           power = 0.8
##      alternative = two.sided
```

```
# Thickness - age
pwr.r.test(n = NULL, r = -0.62, sig.level = 0.01 , power = 0.80)
```

```
##
##      approximate correlation power calculation (arctangh transformation)
##
##           n = 24.86422
##           r = 0.62
##      sig.level = 0.01
##           power = 0.8
##      alternative = two.sided
```

```
# Surface area - age
pwr.r.test(n = NULL, r = -0.57, sig.level = 0.01 , power = 0.80)
```

```
##
##      approximate correlation power calculation (arctangh transformation)
##
##           n = 30.46847
##           r = 0.57
##      sig.level = 0.01
##           power = 0.8
```

```
## alternative = two.sided
```

### Fluid intelligence

For volume and thickness, we use correlation coefficients from this study (see Figure 3): <https://www.sciencedirect.com/science/article/pii/S105381192030063X>

```
# Volume - fluid intelligence  
pwr.r.test(n = NULL, r = -0.68, sig.level = 0.01 , power = 0.80)
```

```
##  
## approximate correlation power calculation (arctangh transformation)  
##  
## n = 19.67695  
## r = 0.68  
## sig.level = 0.01  
## power = 0.8  
## alternative = two.sided
```

```
# Thickness - fluid intelligence  
pwr.r.test(n = NULL, r = -0.69, sig.level = 0.01 , power = 0.80)
```

```
##  
## approximate correlation power calculation (arctangh transformation)  
##  
## n = 18.93792  
## r = 0.69  
## sig.level = 0.01  
## power = 0.8  
## alternative = two.sided
```

```
# Surface area - fluid intelligence  
pwr.r.test(n = NULL, r = -0.4, sig.level = 0.01 , power = 0.80)
```

```
##  
## approximate correlation power calculation (arctangh transformation)  
##  
## n = 67.60322  
## r = 0.4  
## sig.level = 0.01  
## power = 0.8  
## alternative = two.sided
```

### Age-residualized fluid intelligence

Because very few studies have age-residualized cognitive abilities, no reliable, well-powered correlation coefficients were available in the literature. We therefore did not run a priori power analyses for these correlations.
